# Supplementary material for: How growth without siblings affects adult brain and behavior
Source: Research Square preprint supplement (doi:10.21203/rs.3.rs-3707132/v1), 2024-01-05
Supplement: Supplementary file 1 [file 79ce3bb3abbd9c957390d607.docx]

**
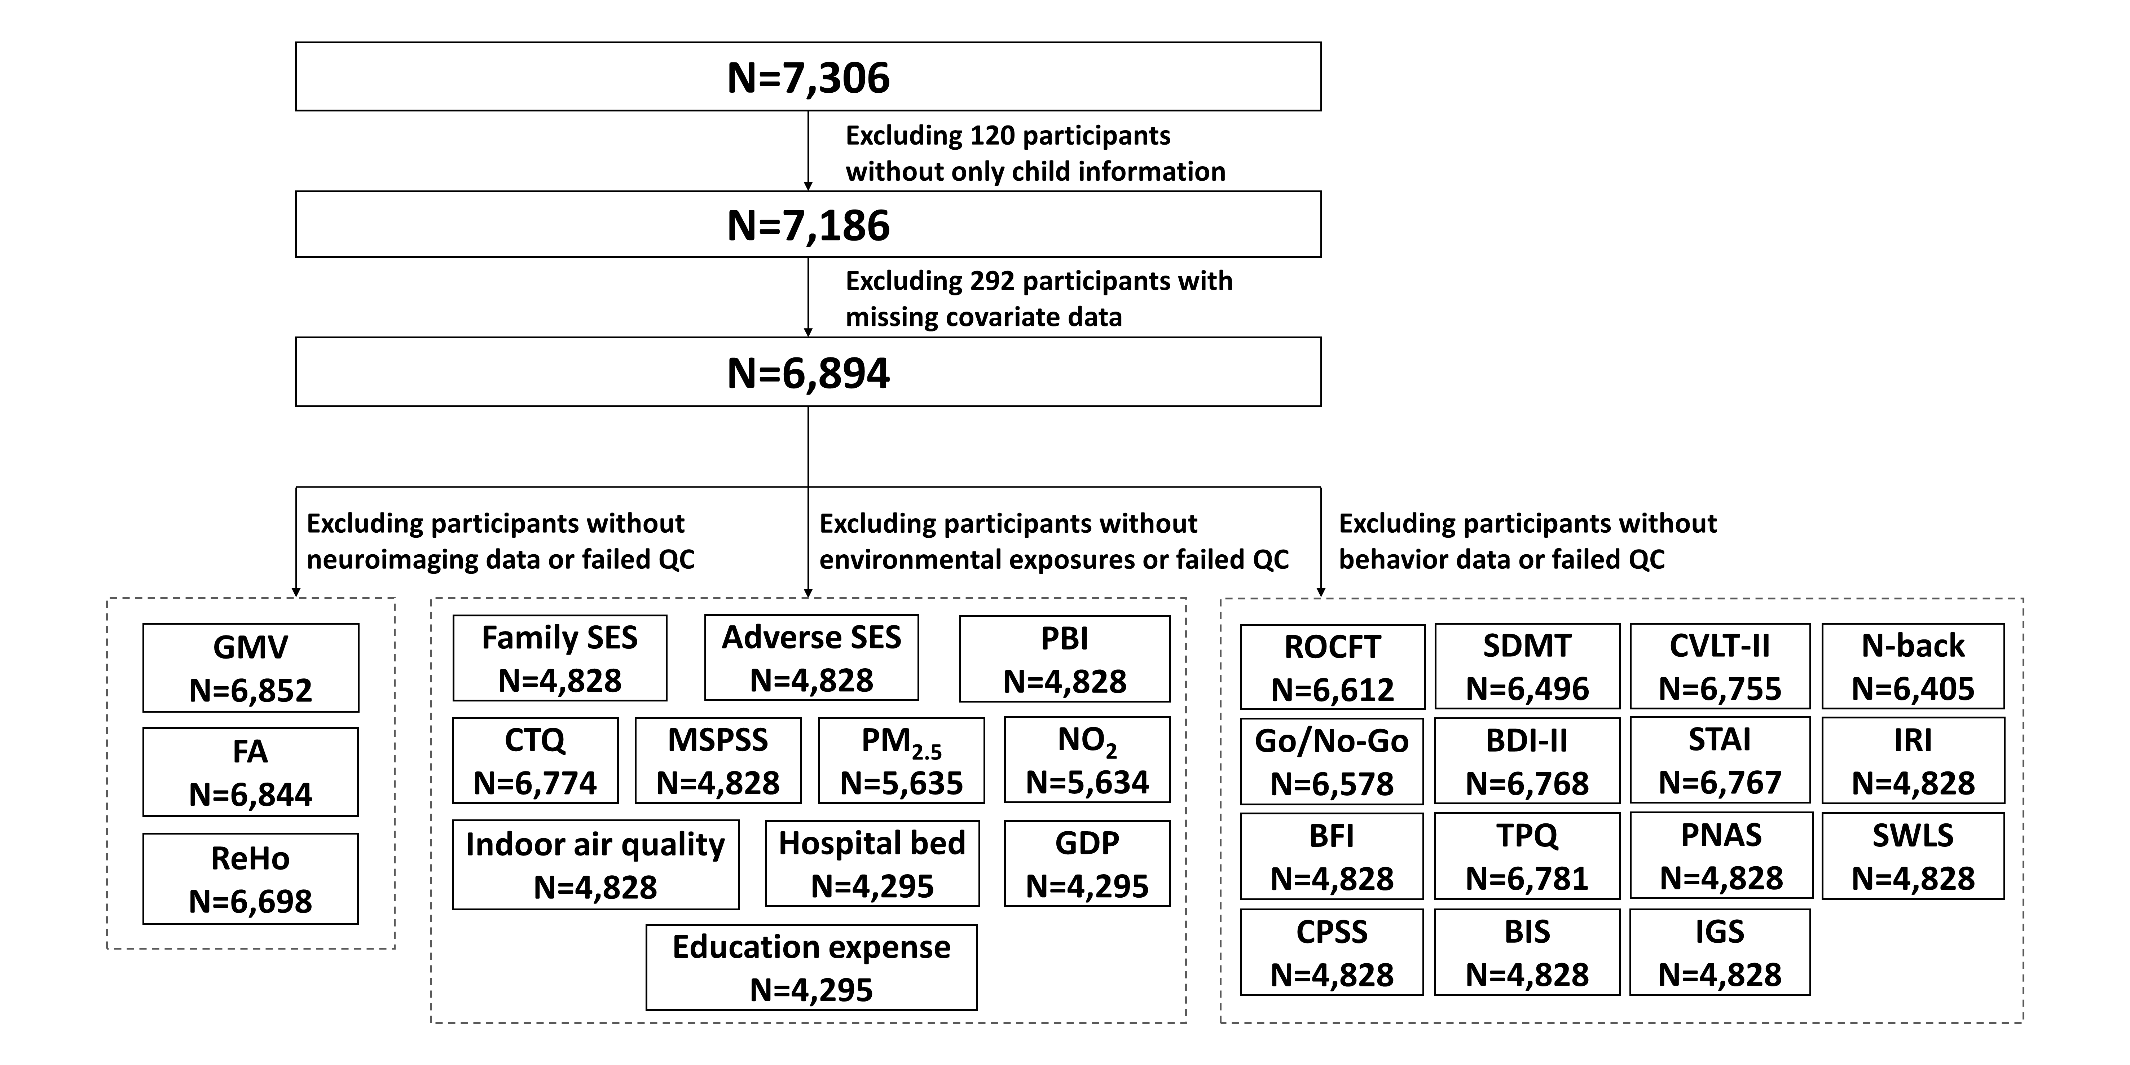
 Supplementary Fig. 1.** **The flow diagram of sample selection.** Covariates include age, sex, the interaction of age and sex, education, BMI, genetic population stratification, TIV and mean FD. Abbreviations: BDI-II, Beck depression inventory, second edition; BFI, big five inventory; BIS, Barratt impulsiveness scale; CPSS, Chinese perceived stress scale; CVLT-II, California verbal learning test, second edition; CTQ, childhood trauma questionnaire; FA, fractional anisotropy; FD, frame-wise displacement; GDP, gross domestic product; GMV, gray matter volume; IGS, interpersonal goals scale; IRI, interpersonal reactivity index; MSPSS, multidimensional scale of perceived social support; NO2, nitrogen dioxide; PBI, parental bonding instrument; PM2.5, particulate matter 2.5; PNAS, positive and negative affect scale; QC, quality control; ReHo, regional homogeneity; ROCFT, Rey-Osterrieth complex figure test; SDMT, symbol digit modalities test; SES, socioeconomic status; STAI, state and trait anxiety inventory; SWLS, satisfaction with life scale; TIV, total intracranial volume; TPQ, tridimensional personality questionnaire.

**
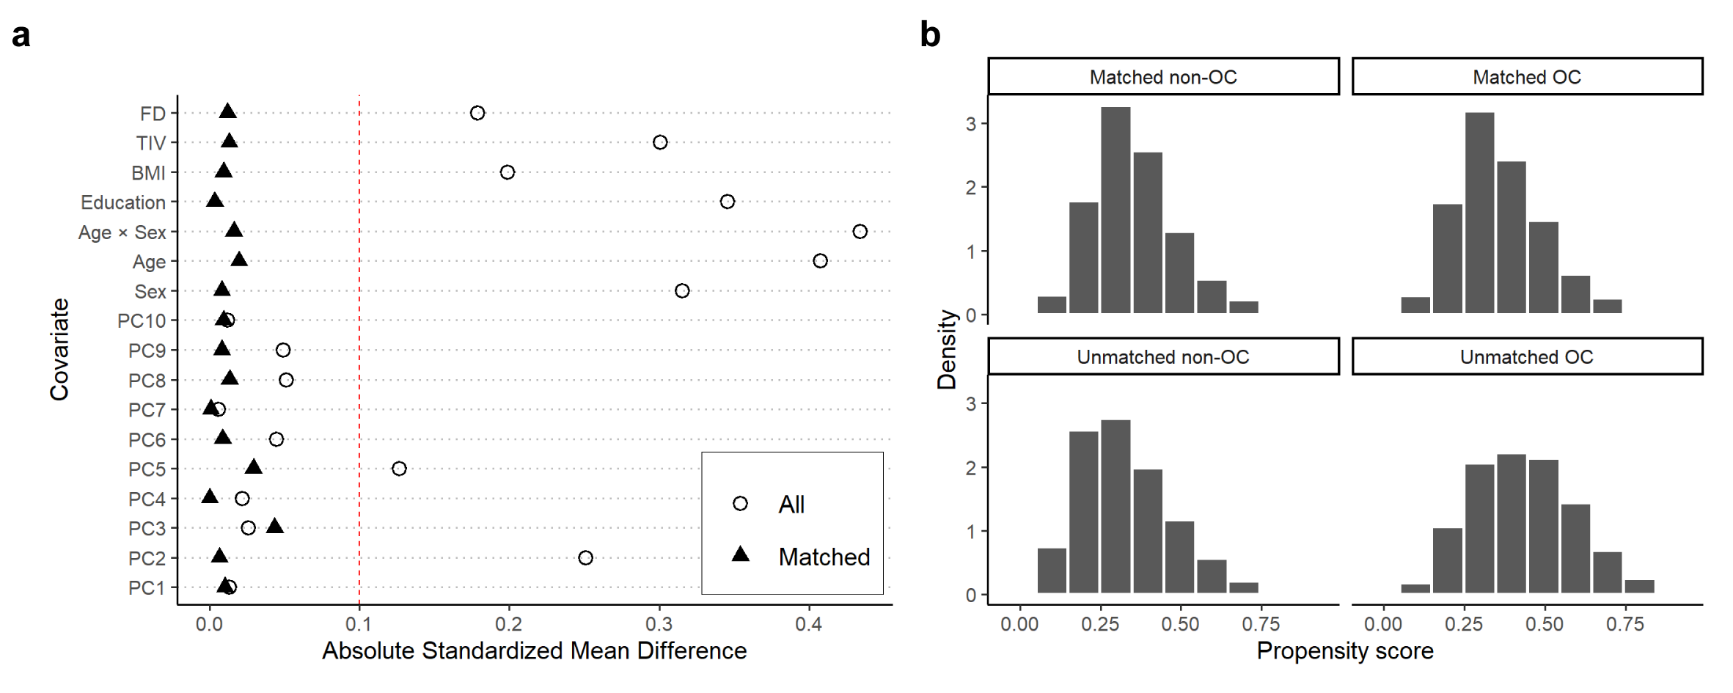
**

**Supplementary Fig. 2. Propensity score matching controls for covariates**. (**a**) The absolute standardized mean differences of 17 confounding covariates between OC and non-OC are reduced below 0.05 after matching. (**b**) The distributions of propensity scores after matching are similar between OC and non-OC. Abbreviations: BMI, body mass index; FD, frame-wise displacement; OC, only children; PC, principal component derived from principal component analysis of genomic data; TIV, total intracranial volume.

**
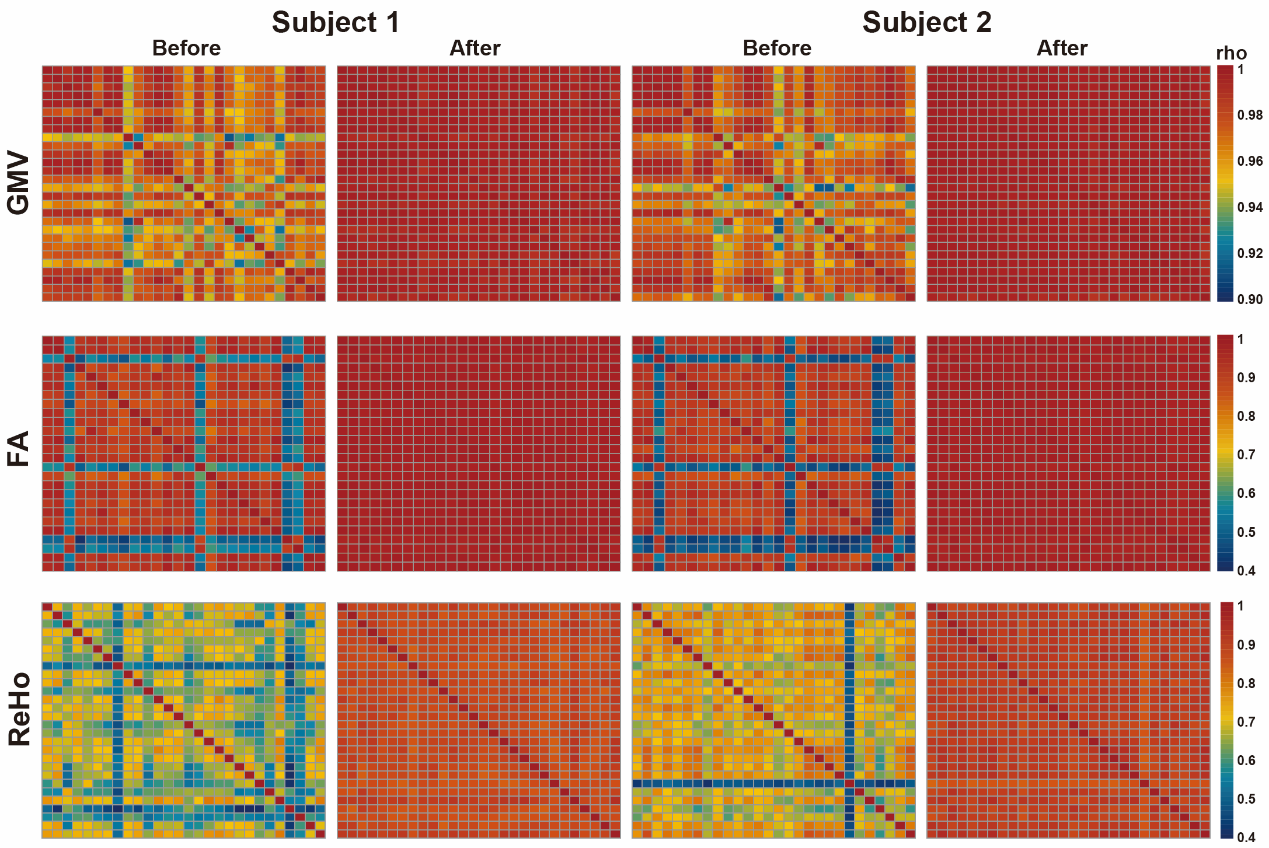
**

**Supplementary Fig. 3.** **Consistency of brain imaging measures across scanners before and after ComBat harmonization**. Two subjects have travelled to research sites and are scanned by 28 different scanners. For each subject, we create voxel-wise GMV, FA, and ReHo maps based on MRI data acquired by each scanner and apply Combat harmonization to these maps to adjust for the scanner effect. Then we calculate the across-voxel Pearson correlation of each measure based on voxel-wise maps before and after harmonization, respectively. In each heatmap, both x-axis and y-axis are the 28 scanners and value in each cell represents the across-voxel correlation of GMV (upper), FA (middle), or ReHo (lower) between every two scanners. The consistency of voxel-wise imaging measures across scanners are greatly improved after Combat harmonization. Abbreviations: FA, fractional anisotropy; GMV, gray matter volume; MRI, magnetic resonance imaging; ReHo regional homogeneity.


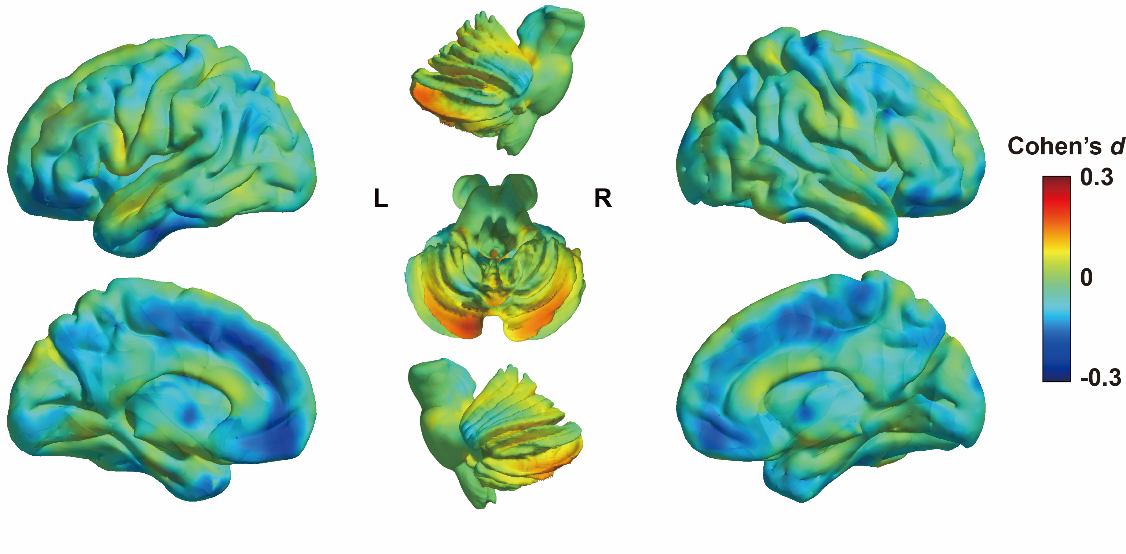


**Supplementary Fig. 4. Voxel-wise GMV difference between participants with and without siblings.** The effect size is measured by Cohen’s *d*. Abbreviations: GMV, gray matter volume; L, left; R, right.


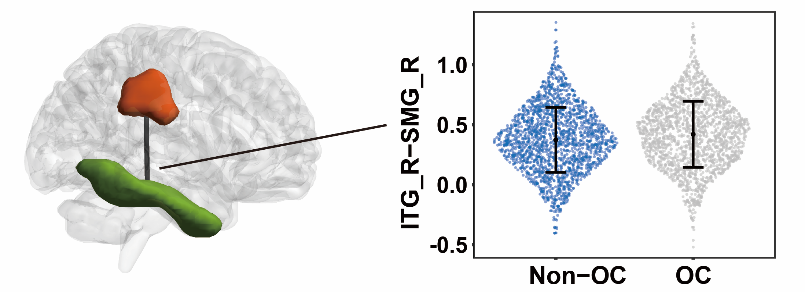


**Supplementary Fig. 5. Intergroup difference in FC between right ITG and SMG.** Compared with non-OC, OC show stronger FC between right ITG and SMG (Cohen’s *d =* 0.16, *P* = 1.83×10-7). Violin plot depicts density distribution of the data, and the black point and error bar represent for mean ± SD; Blue and grey dots represent OC and non-OC, respectively. Abbreviations: FC, functional connectivity; ITG, inferior temporal gyrus; OC, only children; R, right; SMG, supramarginal gyrus.


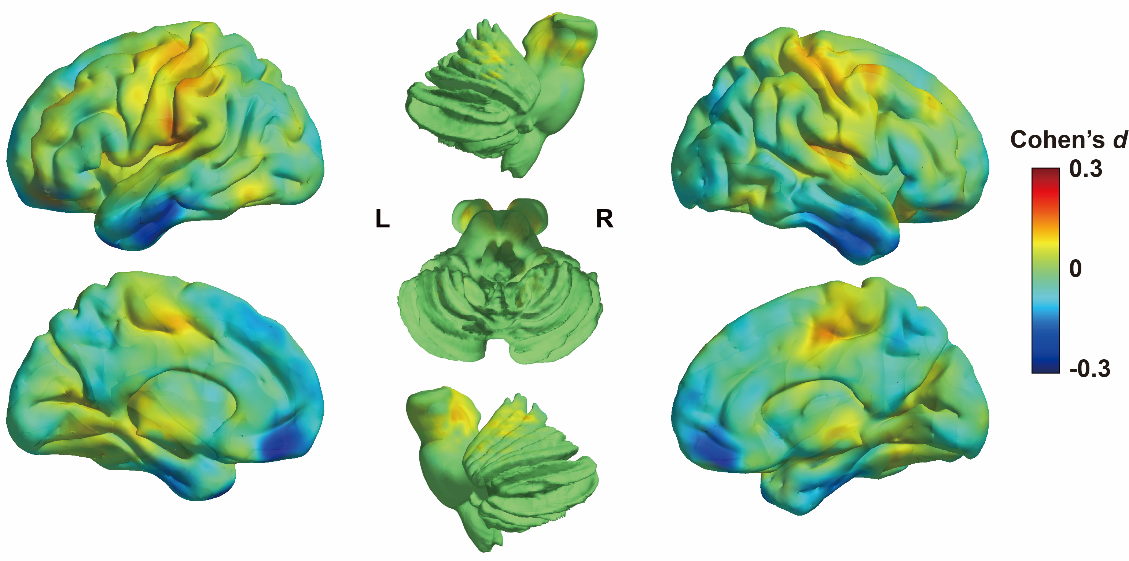


**Supplementary Fig. 6. Voxel-wise ReHo difference between participants with and without siblings.** The effect size is measured by Cohen’s *d*. Abbreviations: L, left; R, right; ReHo, regional homogeneity.


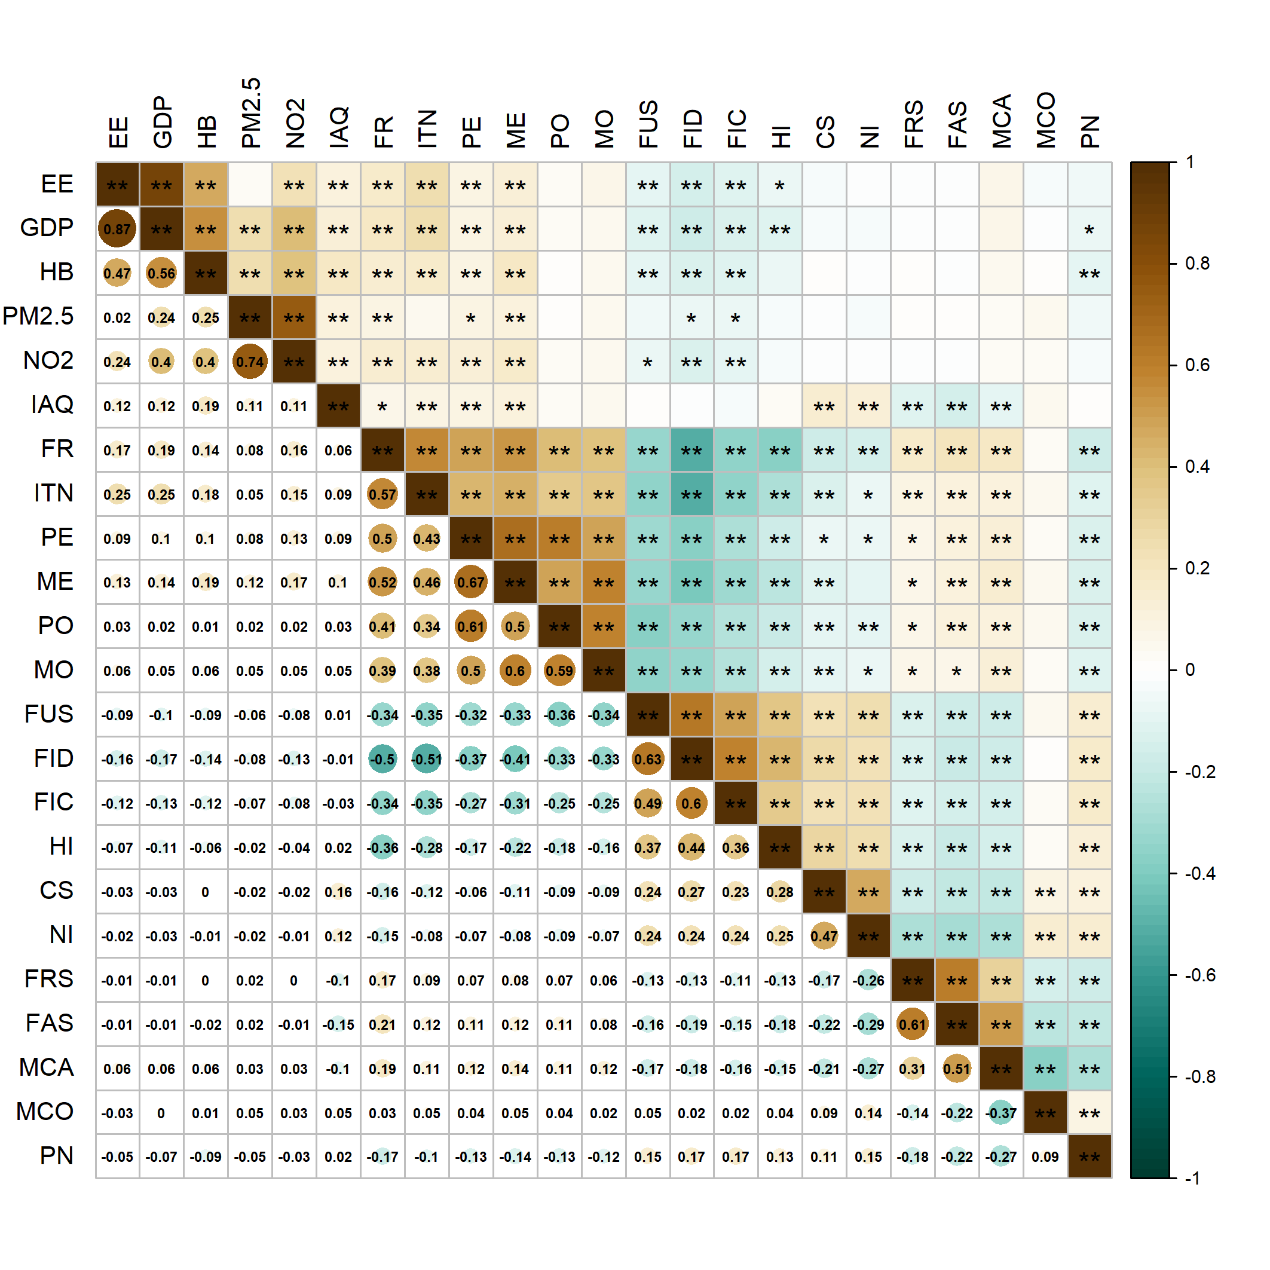


**Supplementary Fig. 7. Spearman rank correlations between every pair of proximal environmental exposures.** The upper triangle shows the statistical significance (**P* < 0.05; ***P* < 0.001), and the lower one shows the correlation coefficient. Abbreviations: CS, community safety; EE, education expense; FAS, family support; FIC, financial crisis; FID, financial difficulty; FR, family resources; FRS, friend support; FUS, family unemployment stress; GDP, gross domestic product; GWS, growth without siblings; HB, hospital beds; HI, home inadequacy; IAQ, indoor air quality; ITN, income to need; MCA, maternal care; MCO, maternal control; ME, maternal education; MO, maternal occupation; NI, neighbor indifference; NO2, nitrogen dioxide; PE, paternal education; PM2.5, particulate matter 2.5; PN, physical neglect; PO, paternal occupation.

**
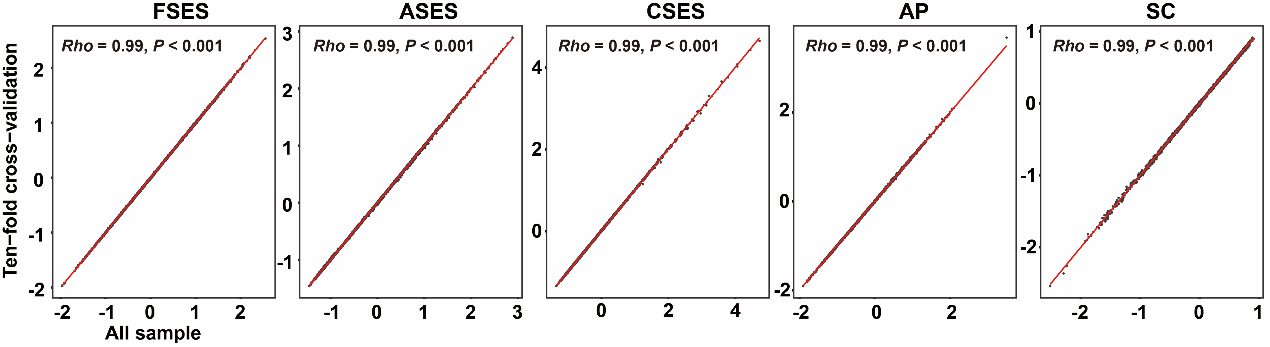
**

**Supplementary Fig. 8. Correlations of PEE factor scores derived from 10-fold cross-validation and total sample.** The scatter plots show Spearman rank correlations of PEE factor scores predicted from 10-fold cross-validation and from the total sample. For each iteration, 90% participants are used to construct a five-factor CFA model, and the obtained factor loadings are used to predict factor scores of other 10% participants. Abbreviations: AP, air pollution; ASES, adverse socioeconomic status; CFA, confirmatory factor analysis; CSES, city-level socioeconomic status; FSES, family socioeconomic status; SC, support and care.

**
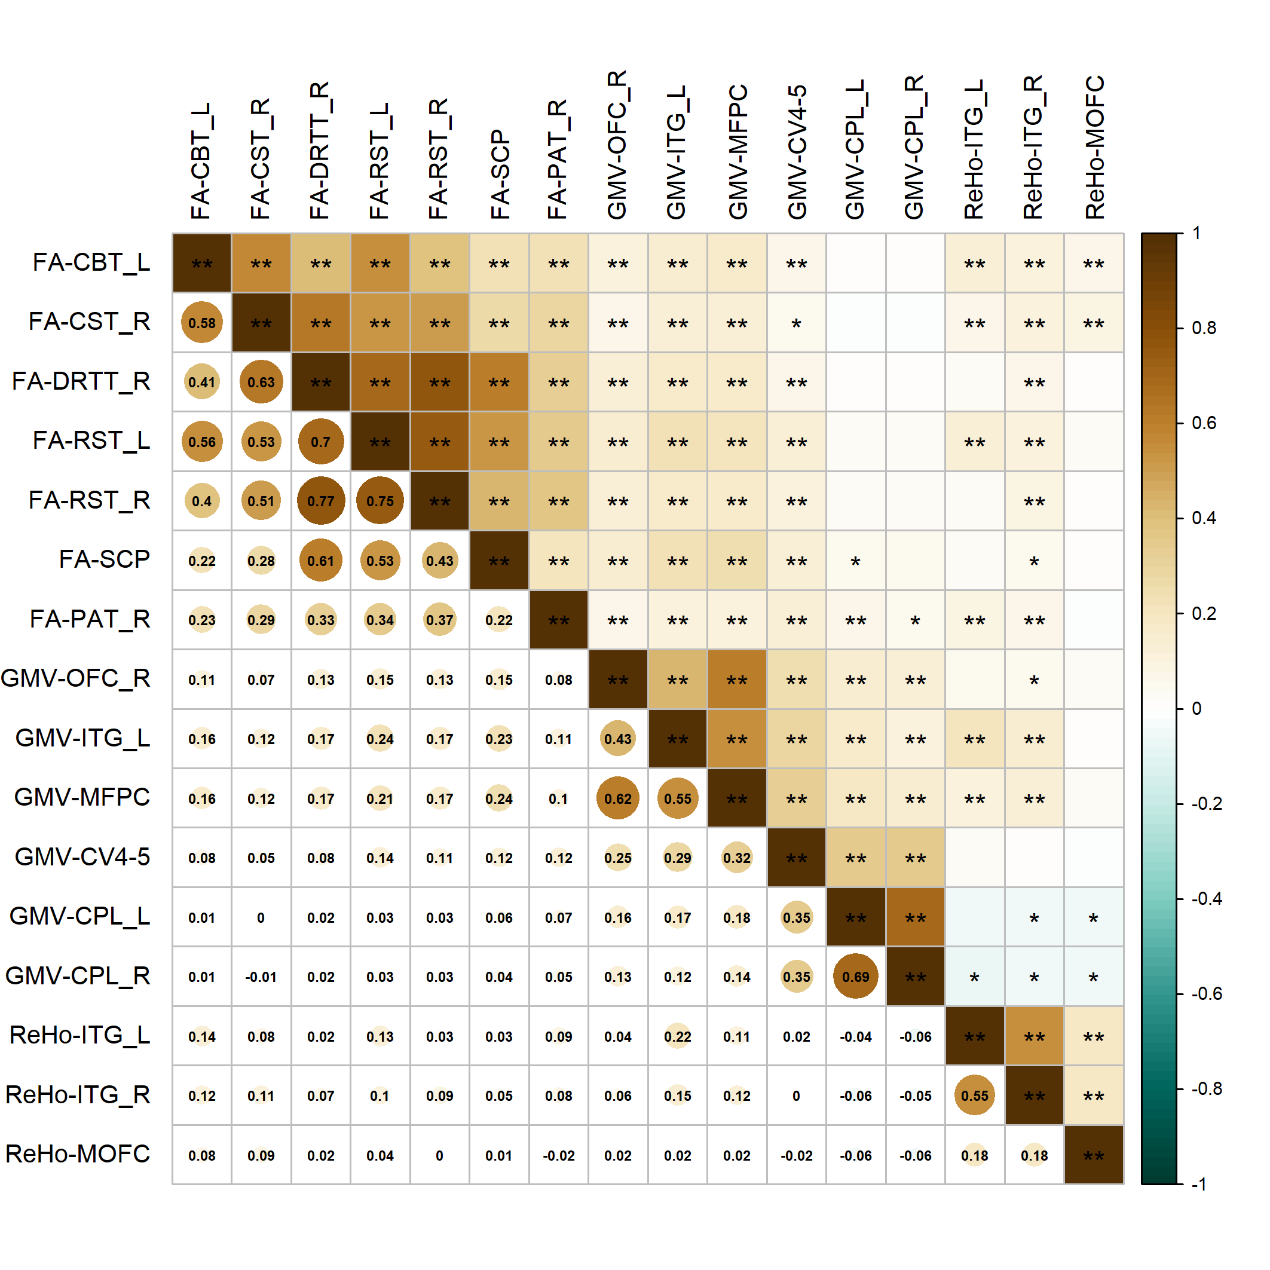
**

**Supplementary Fig. 9.** **Spearman rank correlations between IDPs associated with GWS.** Each of the 16 IDPs is a cluster or a phenotype with significant difference in imaging measure between OC and non-OC in the voxel-wise or phenotype-wise comparison. Each cell in the heatmap shows Spearman rank correlation between every two IDPs. The upper triangle shows the statistical significance (**P* < 0.05; ***P* < 0.001), and the lower triangle shows the correlation coefficient. Abbreviations: CBT, corticobulbar tract; CPL, cerebellar posterior lobe; CST, corticospinal tract; CV4-5, cerebellar vermis area 4-5; DRTT, dentato-rubro-thalamic tract; FA, fractional anisotropy; GMV, gray matter volume; GWS, growth without siblings; IDP, image-derived phenotype; ITG, inferior temporal gyrus; L, left; MFPC, medial frontal and parietal cortex; MOFC, medial orbitofrontal cortex; OC, only children; OFC, orbitofrontal cortex; PAT, parietal aslant tract; R, right; ReHo, regional homogeneity; RST, reticulospinal tract; SCP, superior cerebellar peduncle.


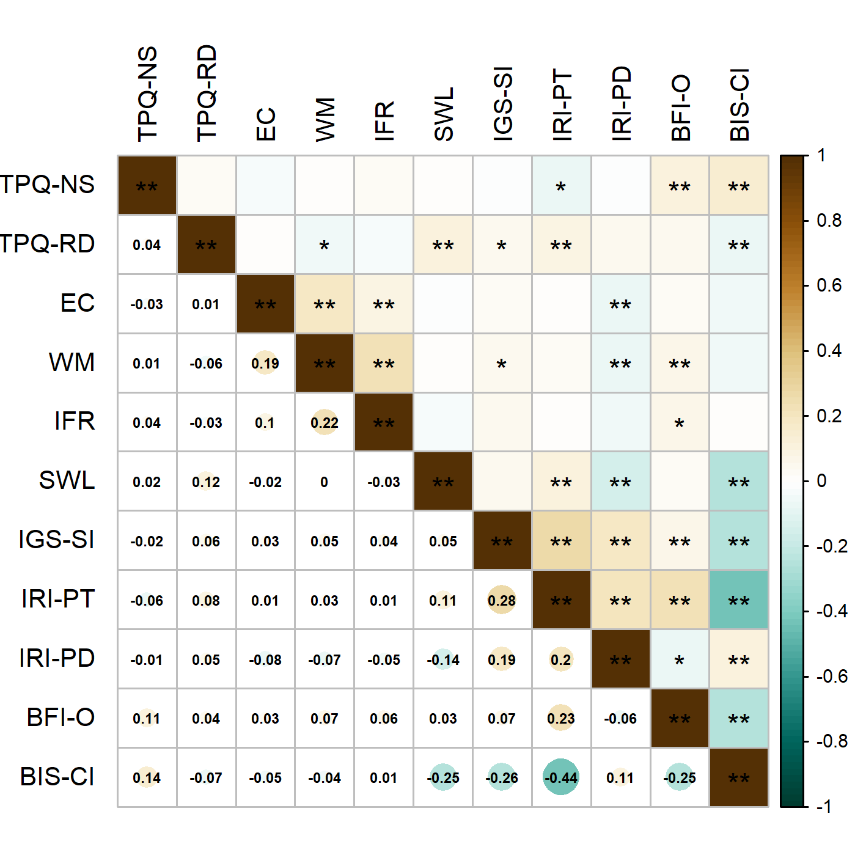


**Supplementary Fig. 10. Spearman rank correlations between behavioral phenotypes associated with GWS.** The 11 behavioral phenotypes are those with significant differences between OC and non-OC. Each cell in the heatmap shows Spearman rank correlation between every two phenotypes. The upper triangle shows the statistical significance (**P* < 0.05; ***P* < 0.001), and the lower triangle shows the correlation coefficient. Abbreviations: BFI, big five inventory; BFI-O, openness; BIS, Barratt impulsiveness scale; BIS-CI, cognitive impulsiveness; EC, executive control; IFR, immediate free recall; IGS, interpersonal goals scale; IGS-SI, self-image goals; IRI, interpersonal reactivity index; IRI-PD, personal distress; IRI-PT, perspective taking; SWL, satisfaction with life; TPQ, tridimensional personality questionnaire; TPQ-NS, novelty seeking; TPQ-RD, reward dependence, WM, working memory.


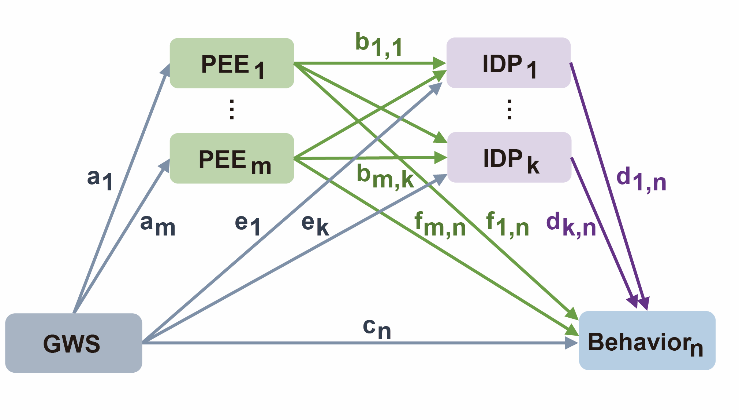


**Supplementary Fig. 11. Hypothesized causal pathways linking GWS to brain and behavioral phenotypes.** PEEm is the PEE latent variable; am is the relative regression coefficient between GWS and PEEm; IDPk is a IDP latent variable or individual IDP; ek is the direct effect of GWS on IDPk accounting for all PEEs; bm,k is the relative effect of PEEm on IDPk accounting for GWS and other PEEs; Behaviorn is a behavioral phenotype; cn is the direct effect of GWS on Behaviorn accounting for all PEEs and IDPs; fm,n is the relative effect of PEEm on Behaviorn accounting for GWS, IDPs and other PEEs; m, n, and k is the number of variables or latent variables of PEE, behavior, and IDP in the SEM, respectively. In this model, am × fm,n is the indirect effect in the GWS-PEE-behavior pathway; ek × dk,n is the indirect effect in the GWS-IDP-behavior pathway; am × bm,k × dk,n is the indirect effect in the GWS-PEE-IDP-behavior pathway. A two-sided *P*＜0.05 is considered statistically significant. Abbreviations: GWS, growth without siblings; IDP, imaging-derived phenotypes; PEE, proximal environmental exposure.
