# Supplementary material for: How growth without siblings affects adult brain and behavior
Source: Research Square preprint supplement (doi:10.21203/rs.3.rs-3707132/v1), 2024-01-05
Supplement: Supplementary file 2 [file f87ae2308d518e64eb38f6a7.xlsx]

## Sheet: Supplementary Table 1
Supplementary Table 1. Inclusion and exclusion criteria for the CHIMGEN participants.
Categories	Items	Actions
Demographics	Age of 18-30 years	Inclusion
	Chinese Han in recent three generations	Inclusion
	Right-handedness confirmed by handedness questionnaire	Inclusion
	Relatives have not participated in this study	Inclusion
Medical histories	Neuropsychiatric diseases	Exclusion
	Consciousness loss for more than 5 minutes	Exclusion
	Brain injury or neurosurgery	Exclusion
	Severe physical illnesses (diabetes, cancers, etc.)	Exclusion
	Visible brain abnormalities on previous MRI examinations	Exclusion
Conditions	Alcohol or drug abuse or dependence	Exclusion
	The total number of cigarettes so far is more than 20	Exclusion
	Currently with any medication (including contraceptives)	Exclusion
	Taking drugs that might affect the brain	Exclusion
	Using sedative hypnotics within one month	Exclusion
	Neuropsychiatric disorders in three generation relatives	Exclusion
	Color blindness or difficulty in color discrimination	Exclusion
	Women in pregnancy or in the menstrual period	Exclusion
	Strenuous exercise or consumption of stimulating drinks	Exclusion
	Without enough sleep at the night before the experiment	Exclusion
MR contraindications	Metal implants	Exclusion
	Electronic implants (such as pacemakers)	Exclusion
	Severe claustrophobia	Exclusion
Abbreviations: CHIMGEN, Chinese Imaging Genetics; MRI, magnetic resonance imaging

## Sheet: Supplementary Table 2
Supplementary Table 2. Distribution of 6,894 participants across the 32 research sites.
Site ID	Site name	Number of participants	MRI scanners
1	Tianjin Medical University General Hospital	1689	GE DISCOVERY MR750
2	Tianjin Medical University Cancer Institute and Hospital	784	GE DISCOVERY MR750
3	Henan Provincial People’s Hospital	445	GE DISCOVERY MR750
4	The First Affiliated Hospital of Zhengzhou University	449	GE DISCOVERY MR750
5	Jinling Hospital, Medical School of Nanjing University	315	GE DISCOVERY MR750
6	Drum Tower Hospital, Medical School of Nanjing University	246	Philips Ingenia
7	Institute of Psychology, Chinese Academy of Sciences	223	GE DISCOVERY MR750
8	Tongji Hospital, Tongji Medical College, Huazhong University of Science and Technology	204	GE DISCOVERY MR750
9	The Affiliated Hospital of Xuzhou Medical University	199	GE DISCOVERY MR750w
10	The Second Hospital of Hebei Medical University	162	Philips Achieva
11	University of Science and Technology of China	160	GE DISCOVERY MR750
12	Peking University	106	Siemens Prisma
13	Tangdu Hospital, Air Force Medical University	151	GE DISCOVERY MR750
14	Beijing Tongren Hospital, Capital Medical University	139	GE DISCOVERY MR750
15	Characteristic Medical Center of Chinese People's Armed Police Force	139	GE DISCOVERY MR750
16	Qilu Hospital of Shandong University	94	Siemens Verio
17	The First Affiliated Hospital of Dalian Medical University	89	GE Signa HDxt
18	The First Affiliated Hospital of Guangzhou University of Chinese Medicine	99	GE Signa HDxt
19	The First Affiliated Hospital of Guangzhou University of Chinese Medicine	102	Siemens Prisma
20	Tianjin First Central Hospital	96	GE DISCOVERY MR750
21	The First Affiliated Hospital of Anhui Medical University	96	GE DISCOVERY MR750w
22	The First Affiliated Hospital of Wenzhou Medical University	97	Philips Achieva
23	Xiangya Hospital, Central South University	87	GE Signa HDxt
24	Lanzhou University Second Hospital	98	Siemens Verio
25	The First Hospital of Shanxi Medical University	99	GE Signa HDxt
26	Yantai Yuhuangding Hospital	91	GE DISCOVERY MR750w
27	The Second Affiliated Hospital of Zhejiang University	98	GE DISCOVERY MR750
28	Hainan General Hospital	98	Siemens Skyra
29	The Second Affiliated Hospital of Wenzhou Medical University	83	GE DISCOVERY MR750
30	Tianjin Huanhu Hospital	76	Siemens Skyra
31	Huashan Hospital, Fudan University	37	GE DISCOVERY MR750
32	West China Hospital, Sichuan University	43	Siemens TrioTim

## Sheet: Supplementary Table 3
Supplementary Table 3. Confounding covariate differences between OC and non-OC before and after propensity score matching.
Variables	All sample					Matched sample
	OC (n=2,521)		Non-OC (n=4,373)		SMD	OC (n=2,305)		Non-OC (n=2,305)		SMD
	Mean	SD	Mean	SD		Mean	SD	Mean	SD
Age (years)	23.0726	2.44135	24.0675	2.42712	0.407507	23.659	2.45833	23.7076	2.29988	0.0197654
Gender* (Male/Female)	1,140/1,381	/	1,291/,3082	/	0.315344	733/1,572	/	742/1,563	/	0.00835539
Age × Gender	35.741	12.1948	41.0341	11.756	0.434044	39.6395	11.6323	39.8299	11.6002	0.016373
Education (years)	16.075	1.94496	16.7466	1.95414	0.345332	16.4928	1.93292	16.4859	1.8708	0.00359117
BMI (kg/m2)	21.4801	2.86431	20.9113	2.48729	0.198577	21.0168	2.61992	20.9921	2.47777	0.00943451
PC1a	3.76836e-05	0.0104727	-0.000102364	0.0125059	0.0133726	-2.80069e-05	0.0110413	8.63181e-05	0.0121458	0.0103543
PC2 a	-0.00180382	0.0115166	0.00108628	0.0117669	0.25095	-5.10107e-05	0.0115819	2.70914e-05	0.0105993	0.00674345
PC3 a	0.000161183	0.00931454	-7.79549e-05	0.012656	0.0256736	0.000202944	0.00954576	0.000618547	0.00812597	0.043538
PC4 a	0.000155435	0.0118061	-9.98309e-05	0.0114099	0.0216216	-0.00024096	0.0133412	-0.000238707	0.0114318	0.000168897
PC5 a	-0.000914396	0.0115244	0.000542816	0.0119904	0.126446	-0.000237488	0.0118128	0.000110276	0.0120007	0.0294397
PC6 a	-0.000310971	0.0116775	0.000210095	0.0118749	0.0446213	-0.000217887	0.0119914	-0.000110721	0.0116291	0.00893688
PC7 a	-7.47808e-05	0.0119242	-4.53608e-06	0.0117984	0.00589092	-3.7367e-05	0.011822	-2.5408e-05	0.0112457	0.00101159
PC8 a	-0.000395304	0.0117008	0.000202656	0.0118583	0.051104	6.14632e-05	0.0117811	-9.74986e-05	0.0116222	0.0134929
PC9 a	0.000320045	0.0118443	-0.000262122	0.011786	0.0491516	-0.000363131	0.0120546	-0.000262105	0.0115813	0.00838075
PC10 a	-0.000115337	0.0117277	2.37562e-05	0.0118056	0.0118602	-0.000121428	0.0119158	-0.000233076	0.0115439	0.0093698
TIV	1532.56	152.779	1486.6	144.074	0.300796	1497.8	142.712	1495.91	144.002	0.0132682
FD	0.0668239	0.0437702	0.0590019	0.0339562	0.178705	0.0590232	0.0285797	0.0586757	0.0272152	0.0121578
*Gender is compared using the Chi-square test. aPC is the principal components derived from principal component analysis of genomic data. Abbreviations: OC ,only children; PC, principal component; SD, standard deviation; SMD, standardized mean difference; TIV, total intracranial volume; FD, frame-wise displacement.

## Sheet: Supplementary Table 4
Supplementary Table 4. Brain clusters with significant differences in GMV and ReHo between OC and non-OC in voxel-wise neuroimaging analyses.
Imaging measures	Brain regions	Abbreviations	Number of voxels	Peak MNI coordinates	Peak Cohend's d	OC(Non-OC)
GMV	Medial frontal and parietal cortices	MFPC	8211	x = -1.5, y = 51, z = -16.5	-0.228784	2,295 (2,295)
GMV	Left inferior temporal gyrus	ITG_L	1297	x = -58.5, y = -33, z = -30	-0.221109	2,295 (2,295)
GMV	Right orbitofrontal cortex	OFC_R	263	x = 30, y = 37.5, z = -18	-0.171809	2,295 (2,295)
GMV	Left cerebellar posterior lobe	CPL_L	704	x = -27, y = -78, z = -52.5	0.182141	2,295 (2,295)
GMV	Right cerebellar posterior lobe	CPL_R	779	x = 15, y = -81, z = -42	0.193359	2,295 (2,295)
GMV	Cerebellar vermis area 4-5	CV4-5	347	x = 9, y = -51, z = -21	0.167086	2,295 (2,295)
ReHo	Left inferior temporal gyrus	ITG_L	319	x = -54, y = -15, z = -24	-0.253455	2,260 (2,260)
ReHo	Right inferior temporal gyrus	ITG_R	467	x = 54, y = -15, z = -24	-0.232333	2,260 (2,260)
ReHo	Medial orbitofrontal cortex	MOFC	271	x = 0, y = 45, z = -18	-0.257322	2,260 (2,260)
Abbreviations: GMV, gray matter volume; MNI, Montreal Neurological Institute; OC, only chidren; ReHo, Regional homogeneity.

## Sheet: Supplementary Table 5
Supplementary Table 5. Brain white matter tracts with significant differences in fractional anisotropy between OC and non-OC.
White matter tracts	Abbreviation	Cohen's d	P	OC (n=2,278)		Non-OC (n=2,278)
				Mean	SD	Mean	SD
Anterior_Commissure	AC	-0.00418876	0.887611	0.783031	0.0286665	0.78315	0.0279608
Arcuate_Fasciculus_L	AF_L	0.0888133	0.00274383	0.494863	0.017869	0.493257	0.0183044
Arcuate_Fasciculus_R	AF_R	0.0959052	0.00122083	0.540358	0.0218009	0.538268	0.0218053
Acoustic_Radiation_L	AR_L	-0.0150701	0.611134	0.898127	0.0289529	0.898566	0.0293025
Acoustic_Radiation_R	AR_R	-0.0579707	0.0505227	0.929555	0.0335404	0.931493	0.0333528
Cingulum_Frontal_Parietal_L	C_FP_L	0.00249435	0.93293	0.549348	0.0229736	0.549292	0.0220518
Cingulum_Frontal_Parietal_L	C_FP_R	0.0216415	0.465293	0.256437	0.0122661	0.256175	0.0119118
Cingulum_Frontal_Parahippocampal_L	C_FPH_L	0.0262313	0.376156	0.332436	0.0154848	0.332032	0.0153171
Cingulum_Frontal_Parahippocampal_R	C_FPH_R	-0.0102964	0.728294	0.303146	0.0159903	0.303315	0.0167926
Cingulum_Parahippocampal_L	C_PH_L	0.0633126	0.0327103	0.537544	0.0442284	0.534736	0.0444922
Cingulum_Parahippocampal_R	C_PH_R	0.0951054	0.00134114	0.339017	0.0276811	0.33639	0.0275759
Cingulum_Parahippocampal_Parietal_L	C_PHP_L	0.0288254	0.330796	0.773892	0.0456542	0.772576	0.0456594
Cingulum_Parahippocampal_Parietal_R	C_PHP_R	-0.0155204	0.600523	0.781405	0.0503251	0.782184	0.0500515
Cingulum_Rarolfactory_L	C_R_L	-0.0318729	0.282232	0.112164	0.0115606	0.112532	0.0115173
Cingulum_Rarolfactory_R	C_R_R	0.0579125	0.0507549	0.156681	0.00842178	0.156194	0.00839496
Cerebellum_L	CB_L	0.101853	0.000594114	0.0847738	0.0063187	0.0841265	0.00639407
Cerebellum_R	CB_R	0.0290647	0.326798	0.0754461	0.00596661	0.0752704	0.00612046
Corticobulbar_Tract_L	CBT_L	-0.156574	1.32976e-07	0.801352	0.0329224	0.806493	0.032758
Corticobulbar_Tract_R	CBT_R	-0.110545	0.000193832	0.931065	0.0365044	0.935072	0.0360165
Corpus_Callosum	CC	0.0277542	0.349079	0.656879	0.0186207	0.656362	0.0186845
CNII_L	CNII_L	-0.0155602	0.59959	0.387921	0.0248974	0.388307	0.0248051
CNII_R	CNII_R	-0.02708	0.360911	0.339763	0.0201376	0.34031	0.0202735
CNIII_L	CNIII_L	-0.0884032	0.00287074	0.106371	0.00778576	0.107055	0.00769357
CNIII_R	CNIII_R	0.0058149	0.844459	0.0785804	0.0056315	0.0785473	0.00575847
CNV_L	CNV_L	0.0811052	0.00623146	0.449604	0.0315901	0.447099	0.0301928
CNV_R	CNV_R	0.0583037	0.0492136	0.523146	0.0372167	0.521028	0.0354499
CNVII_L	CNVII_L	0.0953609	0.00130158	0.042606	0.00650127	0.0419724	0.00678629
CNVII_R	CNVII_R	0.0157571	0.59498	0.187714	0.0255423	0.187308	0.0259982
CNVIII_L	CNVIII_L	-0.049284	0.0963967	0.119288	0.0103089	0.119798	0.0103897
CNVIII_R	CNVIII_R	-0.00951026	0.748307	0.153003	0.0134253	0.153131	0.013414
Corticopontine_Tract_Frontal_L	CPT_F_L	-0.0965711	0.00112838	0.560073	0.0204048	0.562005	0.0196022
Corticopontine_Tract_Frontal_R	CPT_F_R	-0.0699405	0.0183214	0.55538	0.0188682	0.556684	0.0184296
Corticopontine_Tract_Occipital_L	CPT_O_L	-0.0849268	0.00418166	0.81126	0.0265699	0.813495	0.0260696
Corticopontine_Tract_Occipital_R	CPT_O_R	0.00672505	0.820501	0.81413	0.0286831	0.813939	0.0282028
Corticopontine_Tract_Parietal_L	CPT_P_L	-0.00890306	0.763883	0.602485	0.0202256	0.602664	0.0198933
Corticopontine_Tract_Parietal_R	CPT_P_R	-0.0269737	0.362798	0.707366	0.0237343	0.708005	0.0235949
Corticostriatal_Tract_Anterior_L	CSA_L	-0.0764377	0.0099359	0.556716	0.0232642	0.558511	0.0237094
Corticostriatal_Tract_Anterior_R	CSA_R	-0.114816	0.000108532	0.543263	0.0229502	0.545922	0.0233685
Corticostriatal_Tract_Posterior_L	CS_P_L	0.0202562	0.49434	0.637071	0.0237889	0.636593	0.0234101
Corticostriatal_Tract_Posterior_R	CS_P_R	-0.00286037	0.923117	0.955406	0.0357607	0.955508	0.0353587
Corticostriatal_Tract_Superior_L	CS_S_L	-0.00349551	0.906117	0.577086	0.0191563	0.577153	0.0191456
Corticostriatal_Tract_Superior_R	CS_S_R	-0.00217354	0.94154	0.649945	0.0208982	0.64999	0.0211903
Cortico_Spinal_Tract_L	CST_L	-0.0912773	0.00208341	0.517256	0.0178311	0.518866	0.0174627
Cortico_Spinal_Tract_R	CST_R	-0.137927	3.34996e-06	0.665625	0.0231451	0.66882	0.0232059
Dentatorubrothalamic_Tract_L	DRTT_L	-0.11657	8.50432e-05	0.685123	0.0203077	0.687505	0.0205685
Dentatorubrothalamic_Tract_R	DRTT_R	-0.146246	8.31948e-07	0.82405	0.0238439	0.827556	0.0241171
Extreme_Capsule_L	EMC_L	-0.0232394	0.433002	0.349801	0.0165788	0.350182	0.0161666
Extreme_Capsule_R	EMC_R	0.0167314	0.57241	0.392357	0.0176074	0.392061	0.0178582
Fornix_L	F_L	-0.0510582	0.0849949	0.390951	0.0247023	0.392251	0.0262352
Fornix_R	F_R	-0.0860542	0.0037066	0.359496	0.0198761	0.361226	0.0203409
Frontal_Aslant_Tract_L	FAT_L	0.0759093	0.0104599	0.417421	0.0161826	0.416198	0.0160474
Frontal_Aslant_Tract_R	FAT_R	0.0541737	0.0676281	0.487499	0.020318	0.486391	0.0206026
Inferior_Cerebellar_Peduncle_L	ICP_L	0.0119676	0.686375	0.540187	0.0267922	0.539861	0.0276796
Inferior_Cerebellar_Peduncle_R	ICP_R	-0.0470456	0.112492	0.883032	0.0497876	0.885348	0.0486565
Inferior_Fronto_Occipital_Fasciculus_L	IFOF_L	0.00282952	0.923944	0.550257	0.0207024	0.550199	0.0205492
Inferior_Fronto_Occipital_Fasciculus_R	IFOF_R	-0.0579863	0.0504609	0.700233	0.0243598	0.701654	0.024651
Inferior_Longitudinal_Fasciculus_L	ILF_L	0.0209109	0.480493	0.437593	0.0189039	0.437197	0.0190102
Inferior_Longitudinal_Fasciculus_R	ILF_R	0.0407259	0.16946	0.661044	0.0241941	0.660054	0.0244553
Middle_Cerebellar_Peduncle	MCP	-0.0282318	0.340849	0.474101	0.0214269	0.474698	0.0208819
Middle_Longitudinal_Fasciculus_L	MdLF_L	0.00407956	0.890522	0.489975	0.0257435	0.489867	0.0272645
Middle_Longitudinal_Fasciculus_R	MdLF_R	0.00853552	0.773358	0.342488	0.020882	0.342306	0.0216557
Medial_Lemniscus_L	ML_L	-0.0111669	0.706347	0.714288	0.0233873	0.71455	0.0235008
Medial_Lemniscus_R	ML_R	-0.0371229	0.21042	0.753761	0.0276825	0.754777	0.0270323
Optic_Radiation_L	OR_L	-0.108098	0.000267853	0.946837	0.0346241	0.950572	0.0344949
Optic_Radiation_R	OR_R	-0.0550867	0.0631318	0.717928	0.0318663	0.719672	0.0314636
Parietal_Aslant_Tract_L	PAT_L	0.0580489	0.0502128	0.377332	0.0217582	0.37606	0.0220687
Parietal_Aslant_Tract_R	PAT_R	0.148369	5.76046e-07	0.468503	0.0234243	0.465011	0.0236622
Reticulospinal_Tract_L	RST_L	-0.170132	1.00503e-08	0.53373	0.0173249	0.536662	0.0171535
Reticulospinal_Tract_R	RST_R	-0.129546	1.26369e-05	0.711144	0.0235134	0.714171	0.0232204
Superior_Cerebellar_Peduncle	SCP	-0.122676	3.54662e-05	1.006	0.0403886	1.01103	0.0414952
Superior_Longitudinal_Fasciculus1_L	SLF1_L	-0.016674	0.57373	0.578924	0.0249599	0.579332	0.0239775
Superior_Longitudinal_Fasciculus1_R	SLF1_R	0.0214316	0.469633	0.206017	0.0117279	0.20577	0.0112412
Superior_Longitudinal_Fasciculus2_L	SLF2_L	0.0897032	0.00248592	0.479079	0.0189039	0.477383	0.0189258
Superior_Longitudinal_Fasciculus2_R	SLF2_R	0.0442879	0.135154	0.61925	0.0221198	0.618266	0.0223582
Superior_Longitudinal_Fasciculus3_L	SLF3_L	0.052474	0.0767008	0.509306	0.0223432	0.508123	0.0227468
Superior_Longitudinal_Fasciculus3_R	SLF3_R	0.0190841	0.519654	0.710352	0.0282073	0.709813	0.0282314
Thalamic_Radiation_Anterior_L	TR_A_L	-0.0829075	0.00517262	0.578928	0.0214851	0.580728	0.0219482
Thalamic_Radiation_Anterior_R	TR_A_R	-0.106146	0.00034515	0.798391	0.0295184	0.801539	0.0298211
Thalamic_Radiation_Posterior_L	TR_P_L	-0.017419	0.556731	0.627655	0.0244282	0.62808	0.0244775
Thalamic_Radiation_Posterior_R	TR_P_R	-0.0416085	0.160405	0.75333	0.0293921	0.754539	0.0286913
Thalamic_Radiation_Superior_L	TR_S_L	-0.0324419	0.273731	0.609675	0.0188975	0.610288	0.0188685
Thalamic_Radiation_Superior_L	TR_S_R	-0.0170788	0.564464	0.590261	0.0182191	0.590571	0.0181001
Uncinate_Fasciculus_L	UF_L	-0.0086079	0.771489	0.566381	0.0268933	0.566609	0.0258765
Uncinate_Fasciculus_R	UF_R	-0.0840787	0.00457474	0.695637	0.030139	0.698184	0.0304655
Vermis	V	0.0895391	0.00253195	0.217154	0.0178769	0.215447	0.0201803
Vertical_Occipital_Fasciculus_L	VOF_L	0.045432	0.125358	0.285038	0.0263445	0.283855	0.0257445
Vertical_Occipital_Fasciculus_R	VOF_R	0.0958327	0.00123134	0.370786	0.0342397	0.367592	0.0324126
The significant threshold is at P < 0.05/87/3/3 = 6.38×10-5. Abbreviations: L, left; OC,only children; R, right; SD, standard deviation.

## Sheet: Supplementary Table 6
Supplementary Table 6. Behavioral differences between OC and non-OC.
Domain	Instrument	Variable	Measure	OC			Non-OC			Cohen's d	P
				Mean	SD	N	Mean	SD	N
Verbal learning memory	California verbal learning test II (CVLT-II)	IFR	Total number of correct words of list A in five trials for immediate free recall	56.1657	8.60184	2251	54.9565	8.78655	2251	0.139109	3.16258e-06
		SDFR	Number of correct words for short delayed free recall	12.478	2.51941	2251	12.5149	2.44024	2251	-0.0148704	0.617967
		SDCR	Number of correct words for short delayed cued recall	12.8668	2.2688	2253	12.7395	2.36201	2253	0.0550177	0.064933
		LDFR	Number of correct words for long delayed free recall	12.9067	2.36703	2251	12.9049	2.37109	2251	0.000750247	0.979925
		LDCR	Number of correct words for long delayed cued recall	13.1203	2.2704	2253	13.0772	2.32568	2253	0.0187378	0.529536
Working memory	N-back test (NBT)	WM	3-back accuracy	0.751517	0.161416	2153	0.72039	0.154645	2153	0.196969	1.15532e-10
Visuospatial memory	Rey-Osterrieth complex figure test (ROCFT)	RO-IR	Immediate recall	25.0929	4.97222	2193	24.8234	4.91848	2193	0.0545152	0.0711785
		RO-DR	Delay recall	24.885	4.94669	2195	24.6583	4.80316	2195	0.0464989	0.123611
Information processing speed	Symbol digit modalities test (SDMT)	SDMT	Correct number of digits	70.2177	11.8559	2159	69.8231	11.6204	2159	0.0336252	0.269426
Executive control	Go/No-Go test	EC	No-Go accuracy	0.563169	0.187924	2185	0.533421	0.184139	2185	0.159938	1.31671e-07
Social cognition	Interpersonal reactivity index questionnaire (IRI)	IRI-PT	Perspective taking	11.1212	3.94629	1617	10.5325	3.59408	1617	0.156036	9.49993e-06
		IRI-F	Fantasy	14.5349	4.12838	1617	14.1837	3.9012	1617	0.0874856	0.0129398
		IRI-EMC	Empathy concern	16.7446	3.60997	1617	17.0495	3.34635	1617	-0.0876214	0.0128004
		IRI-PD	Personal distress	7.24552	4.19435	1617	7.79406	4.12449	1617	-0.131917	0.000180091
	Interpersonal goals scale (IGS)	IGS-C	Compassionate	35.1732	5.25192	1617	34.799	5.22108	1617	0.0714721	0.0422738
		IGS-SI	Self-image	31.5312	5.51936	1617	30.8169	5.62547	1617	0.128216	0.000272032
Mental health	Beck depression inventory II (BDI-II)	BDI	Depression	3.55865	4.57101	2259	3.37583	4.60426	2259	0.0398601	0.180533
	State and trait anxiety inventory (STAI)	SAI	State anxiety	30.2362	7.71282	2261	30.5869	7.23861	2261	-0.0469027	0.114945
		TAI	Ttrait anxiety	33.7192	7.93566	2261	33.9872	7.43344	2261	-0.0348673	0.241227
	The positive and negative affect scale (PNAS)	PNAS-PA	Positive affect	31.9085	6.43554	1617	31.428	6.16129	1617	0.0762977	0.0301717
		PNAS-NA	Negative affect	21.462	5.95403	1617	22.0909	5.83655	1617	-0.106713	0.00243769
	The perceived stress scale (PSS)	PSS	Perceived stress	30.2078	4.81593	1617	30.1101	4.71439	1617	0.0205106	0.559919
	The satisfaction with life scale (SWL)	SWL	Satisfaction with life	23.3191	6.6032	1617	22.4323	6.68801	1617	0.133484	0.000150753
Personality	Barratt impulsiveness scale (BIS)	BIS-MI	Motor impulsiveness	22.8145	5.83309	1617	23.4032	5.61773	1617	-0.102844	0.00348675
		BIS-CI	Cognitive impulsiveness	22.8454	4.85988	1617	23.6957	4.85879	1617	-0.175045	6.84022e-07
		BIS-NPI	No-planning impulsiveness	23.1886	5.76013	1617	23.4174	5.63621	1617	-0.0401666	0.253643
	The revised NEO big five inventory (BFI)	BFI-A	Agreeableness	32.0303	5.50649	1617	32.0303	4.86231	1617	0	1
		BFI-C	Conscientiousness	31.1707	6.56163	1617	31.2573	6.012	1617	-0.0137628	0.695666
		BFI-E	Extraversion	26.3185	7.02008	1617	26.5894	6.48071	1617	-0.0401073	0.254345
		BFI-N	Neuroticism	19.0643	7.98519	1617	19.6469	7.6417	1617	-0.0745638	0.0341244
		BFI-O	Openness	26.1948	5.37042	1617	24.564	4.69408	1617	0.32344	6.67155e-20
	Tridimensional personality questionnaire (TPQ)	TPQ-NS	Novelty seeking	14.1401	4.57234	2269	13.4786	4.36396	2269	0.148046	6.41351e-07
		TPQ-HA	Harm avoidance	13.613	5.6701	2269	13.6316	5.35997	2269	-0.00335576	0.910032
		TPQ-RD	Reward dependence	18.7387	3.73387	2269	19.2274	3.58769	2269	-0.133516	7.09308e-06
The significant threshold is at P < 0.05/34/3 = 4.90×10-4. OC, only children; SD, standard deviation.

## Sheet: Supplementary Table 7
Supplementary Table 7. Differences in growth environmental exposures between OC and non-OC.
Environmental exposures	Abbreviation	OC			Non-OC			Cohen's d	P
		Mean	SD	N	Mean	SD	N
Maternal education	ME	3.13544	1.23915	1617	1.95053	0.978748	1617	1.06154	2.22458e-175
Paternal education	PE	3.37291	1.2806	1617	2.31354	1.00187	1617	0.921708	1.16386e-136
Maternal occupation	MO	4.36539	2.27263	1617	2.6879	1.6765	1617	0.840293	1.69809e-115
Family resources	FR	10.263	2.52356	1617	8.09606	2.69692	1617	0.829983	1.20905e-113
Income to need (ten thousand yuan per capita)	ITN	3.04333	2.06302	1613	1.602	1.29641	1613	0.836831	1.65324e-113
Paternal occupation	PO	4.60029	2.24982	1617	3.18975	1.78714	1617	0.694479	9.0785e-82
Financial difficulty	FID	1.59781	0.474422	1617	1.9263	0.479303	1617	-0.689059	8.16714e-81
Financial crisis	FIC	1.16399	0.330474	1617	1.37178	0.474909	1617	-0.508062	1.06792e-45
Family unemployment stress	FUS	1.42898	0.471248	1617	1.65389	0.550629	1617	-0.438988	6.4399e-35
Home inadequacy	HI	1.30705	0.427596	1617	1.50144	0.526326	1617	-0.405525	3.91974e-30
Gross Domestic Product (ten thousand yuan per capita)	GDP	3.27644	1.15761	1455	2.87832	1.11664	1455	0.350174	7.27877e-21
Hospital beds (per 10,000 people)	HB	30.4857	5.79228	1455	28.671	4.95147	1455	0.336906	1.91227e-19
Education expense (ten thousand yuan per 10,000 people)	EE	0.112255	0.0412423	1455	0.100363	0.0346905	1455	0.312175	6.04521e-17
Nitrogen dioxide	NO2	4.40255	2.70063	1883	3.7858	2.2188	1883	0.249613	2.42409e-14
Physical neglect	PN	6.01941	1.87626	2267	6.39965	2.06363	2267	-0.192844	9.44106e-11
Maternal care	MCA	35.6314	4.51869	1617	34.598	4.69244	1617	0.224409	2.03803e-10
Community safety	CS	1.37467	0.434628	1617	1.46155	0.457882	1617	-0.194702	3.37164e-08
Maternal control	MCO	12.1651	2.60342	1617	11.7984	2.23721	1617	0.151136	1.79077e-05
Particulate matter 2.5	PM2.5	51.9264	14.0272	1883	50.238	14.2192	1883	0.119581	0.000247606
Friend support	FRS	22.5844	4.07394	1617	22.0717	3.92344	1617	0.128228	0.000271674
Family support	FAS	22.5022	4.71924	1617	21.9165	4.44617	1617	0.127779	0.000285433
Neighbor indifference	NI	1.4062	0.437355	1617	1.46382	0.470105	1617	-0.126942	0.000312827
Indoor air quality	IAQ	2.44675	0.68056	1617	2.36632	0.631757	1617	0.122541	0.00050194
Emotion abuse	EA	6.02779	1.52665	2267	6.19718	1.77146	2267	-0.102458	0.000568413
Other support	OS	21.6988	4.44857	1617	21.2931	4.02845	1617	0.0956274	0.00659838
Emotion neglect	EN	7.58315	3.51714	2267	7.83944	3.26969	2267	-0.0754909	0.0110859
Paternal care	PCA	32.5152	5.8035	1617	32.0884	5.32207	1617	0.076661	0.0293956
Paternal encouragement	PEN	18.3482	3.85994	1617	18.1212	3.42243	1617	0.0622394	0.0769601
Paternal control	PCO	11.7007	2.44204	1617	11.6215	2.16555	1617	0.0343092	0.32951
Sexual abuse	SA	5.22364	0.794846	2267	5.23776	0.729787	2267	-0.0185039	0.533419
Physical abuse	PA	5.46625	1.27127	2267	5.45523	1.23358	2267	0.00880609	0.766928
Maternal encouragement	MEN	17.7279	3.79048	1617	17.757	3.39713	1617	-0.00807826	0.818396
The significant threshold is at P < 0.05/3/32 = 5.20×10-4. OC ,only children; SD, standard deviation.

## Sheet: Supplementary Table 8
Supplementary Table 8. Model fit statistics for five-factor CFA model in the full sample and 10-fold cross-validation analyses.
Samples	CFI	RMSEA	SRMR
Full sample	0.968833	0.0577327	0.053276
Iteration 1	0.970154	0.0556633	0.0525855
Iteration 2	0.968858	0.0573458	0.0532384
Iteration 3	0.969381	0.0572373	0.0531603
Iteration 4	0.968799	0.0581887	0.0536581
Iteration 5	0.970931	0.0557328	0.0517527
Iteration 6	0.969435	0.0575686	0.0531925
Iteration 7	0.968743	0.0575901	0.0533279
Iteration 8	0.967097	0.0597614	0.055159
Iteration 9	0.967648	0.0587304	0.0546734
Iteration 10	0.969242	0.0573575	0.0533559
Abbreviations: CFA, confirmatory factor analysis; CFI, comparative fit index; RMSEA, root mean square error of approximation; SRMR, standardized root mean squared residual.

## Sheet: Supplementary Table 9
Supplementary Table 9. Full statistics of mediation and moderation of PEEs on the association of GWS with IDPs and behavioral phenotypes in causal mediation analysis (CMA).
Treatmeant (X)	Mediator (M)	Outcome (Y)	Mediation (Indirect) effect				Moderation effect (Treatmeant × Mediator)				Direct effect				Total effect				N
			P	β	95% LCI	95% UCI	P	β	95% LCI	95% UCI	P	β	95% LCI	95% UCI	P	β	95% LCI	95% UCI	OC(Non-OC)
GWS	SC	BFI-O	0.0106	0.0119545	0.00281176	0.0221805	0.2154	-0.0113577	-0.0306395	0.00670186	< 0.0001	0.28348	0.210526	0.356643	< 0.0001	0.295434	0.224061	0.367923	1,451(1,451)
GWS	FSES	BFI-O	< 0.0001	0.203493	0.158168	0.250172	0.3544	0.0415008	-0.0455361	0.132029	0.0338	0.0919096	0.00694822	0.175607	< 0.0001	0.295403	0.222099	0.368008	1,451(1,451)
GWS	CSES	BFI-O	0.0006	0.0239479	0.010162	0.0388771	0.8674	-0.00235546	-0.029716	0.0254361	< 0.0001	0.270285	0.196443	0.342976	< 0.0001	0.294233	0.22111	0.365919	1,451(1,451)
GWS	ASES	BFI-O	0.0088	0.0380451	0.00929479	0.0663439	0.9728	0.000791881	-0.0550292	0.0577266	< 0.0001	0.257183	0.180338	0.333874	< 0.0001	0.295228	0.223902	0.367636	1,451(1,451)
GWS	AP	BFI-O	0.2438	0.00513095	-0.00343949	0.0143305	0.0426	0.017557	0.000436656	0.0371729	< 0.0001	0.290408	0.217445	0.362006	< 0.0001	0.295539	0.222558	0.367149	1,451(1,451)
GWS	SC	BIS-CI	< 0.0001	-0.0609203	-0.0814267	-0.0414379	0.7086	-0.00330527	-0.0216029	0.0140638	0.0316	-0.0777517	-0.147125	-0.00734868	0.0002	-0.138672	-0.210631	-0.0659107	1,451(1,451)
GWS	CSES	BIS-CI	0.3854	-0.00591828	-0.020019	0.00775305	0.888	0.00190517	-0.0255929	0.0298168	0.0006	-0.132758	-0.207312	-0.0582679	0.0006	-0.138676	-0.211789	-0.0656733	1,451(1,451)
GWS	ASES	BIS-CI	< 0.0001	-0.061051	-0.0898454	-0.033147	0.9018	0.00356664	-0.0520176	0.0589773	0.0558	-0.0773006	-0.154506	0.00192701	0.0002	-0.138352	-0.21105	-0.0645537	1,451(1,451)
GWS	AP	BIS-CI	0.0026	-0.0139762	-0.0243826	-0.00501751	0.3296	0.0087064	-0.00887794	0.0275407	0.001	-0.12421	-0.197326	-0.0506255	< 0.0001	-0.138187	-0.211209	-0.0643864	1,451(1,451)
GWS	FSES	BIS-CI	< 0.0001	-0.088902	-0.134213	-0.0436344	0.3598	0.0421945	-0.047587	0.133772	0.2388	-0.0498543	-0.134926	0.0345348	< 0.0001	-0.138756	-0.209661	-0.0662275	1,451(1,451)
GWS	SC	EC	0.4284	0.00355887	-0.00525823	0.0129843	0.6502	0.00415141	-0.0135351	0.0225142	< 0.0001	0.193288	0.121078	0.266994	< 0.0001	0.196847	0.125896	0.269995	1,451(1,451)
GWS	FSES	EC	0.6454	0.0108432	-0.035327	0.056759	0.0376	-0.100154	-0.193834	-0.00575331	< 0.0001	0.186087	0.100365	0.272357	< 0.0001	0.19693	0.124462	0.271048	1,451(1,451)
GWS	CSES	EC	0.519	-0.00452219	-0.0184714	0.00898427	0.1568	-0.019979	-0.0478958	0.00721939	< 0.0001	0.201517	0.126198	0.27639	< 0.0001	0.196995	0.124408	0.270327	1,451(1,451)
GWS	ASES	EC	0.7418	-0.0047816	-0.033539	0.0238574	0.6124	-0.0148702	-0.0734252	0.0444231	< 0.0001	0.201752	0.124044	0.280598	< 0.0001	0.196971	0.124257	0.270466	1,451(1,451)
GWS	AP	EC	0.6196	0.00216108	-0.00652733	0.011039	0.0792	-0.0157375	-0.0360056	0.00160002	< 0.0001	0.194688	0.120976	0.270548	< 0.0001	0.196849	0.122727	0.271852	1,451(1,451)
GWS	SC	FA-CBT_L	0.277	-0.00460299	-0.0134252	0.00366486	0.1854	0.0109804	-0.00544467	0.0290974	0.0002	-0.146563	-0.221108	-0.0711319	0.0002	-0.151166	-0.225824	-0.0777029	1,410(1,410)
GWS	FSES	FA-CBT_L	< 0.0001	-0.102513	-0.14944	-0.0558127	0.736	-0.0156271	-0.106073	0.076471	0.2804	-0.0483105	-0.137289	0.040315	0.0004	-0.150823	-0.223543	-0.0759585	1,410(1,410)
GWS	CSES	FA-CBT_L	0.6468	-0.00350851	-0.0188895	0.0117999	0.4714	0.0110662	-0.0183564	0.0412221	< 0.0001	-0.148252	-0.22428	-0.071816	< 0.0001	-0.151761	-0.224907	-0.0766061	1,410(1,410)
GWS	ASES	FA-CBT_L	0.0406	-0.0304022	-0.0596945	-0.00131661	0.6698	0.012886	-0.0441867	0.0706268	0.0018	-0.12103	-0.199611	-0.0421874	< 0.0001	-0.151432	-0.223051	-0.0782244	1,410(1,410)
GWS	AP	FA-CBT_L	0.1914	-0.00659056	-0.0169697	0.00303014	0.192	0.0133292	-0.00648022	0.0344703	0.0002	-0.144229	-0.218918	-0.0693143	< 0.0001	-0.150819	-0.224563	-0.0764808	1,410(1,410)
GWS	SC	FA-CST_R	0.1344	-0.0063346	-0.0155462	0.00208141	0.6306	0.0040799	-0.0127799	0.0215425	< 0.0001	-0.135684	-0.210213	-0.0610449	< 0.0001	-0.142019	-0.21536	-0.067882	1,410(1,410)
GWS	FSES	FA-CST_R	0.0002	-0.084561	-0.130935	-0.038681	0.5132	-0.0305356	-0.122913	0.0624738	0.1992	-0.0569594	-0.144526	0.02869	< 0.0001	-0.14152	-0.212945	-0.0672733	1,410(1,410)
GWS	CSES	FA-CST_R	0.9612	-0.000372792	-0.0157949	0.0146889	0.7332	0.00500487	-0.024546	0.0347353	< 0.0001	-0.141506	-0.219401	-0.0667909	< 0.0001	-0.141879	-0.218302	-0.0685174	1,410(1,410)
GWS	ASES	FA-CST_R	0.0326	-0.0312312	-0.0608292	-0.00264597	0.561	-0.0171431	-0.0744278	0.0391344	0.0054	-0.110909	-0.190242	-0.0315161	< 0.0001	-0.14214	-0.216833	-0.0689816	1,410(1,410)
GWS	AP	FA-CST_R	0.416	-0.00405442	-0.0142924	0.00564206	0.9308	0.000949789	-0.0182704	0.0208248	0.0004	-0.137089	-0.21144	-0.0623141	0.0004	-0.141144	-0.214573	-0.0666899	1,410(1,410)
GWS	SC	FA-DRTT_R	0.9172	0.000445504	-0.00825941	0.00900527	0.5158	-0.0055265	-0.0226696	0.0110432	< 0.0001	-0.179362	-0.254474	-0.105379	< 0.0001	-0.178917	-0.254115	-0.104916	1,410(1,410)
GWS	FSES	FA-DRTT_R	0.2654	-0.02604	-0.071914	0.0188437	0.1212	-0.073345	-0.164172	0.019344	0.0008	-0.153109	-0.238933	-0.0678014	< 0.0001	-0.179149	-0.252628	-0.108497	1,410(1,410)
GWS	CSES	FA-DRTT_R	0.82	-0.00171971	-0.0163789	0.0133858	0.3078	0.0154473	-0.0143928	0.0459667	< 0.0001	-0.176786	-0.251528	-0.102884	< 0.0001	-0.178506	-0.251479	-0.106628	1,410(1,410)
GWS	ASES	FA-DRTT_R	0.8582	0.00273603	-0.0262231	0.031464	0.9712	0.00121324	-0.0557008	0.0587602	< 0.0001	-0.181646	-0.262625	-0.101148	< 0.0001	-0.17891	-0.254349	-0.105546	1,410(1,410)
GWS	AP	FA-DRTT_R	0.0398	-0.0100855	-0.0207287	-0.000475963	0.4998	0.00682817	-0.0121631	0.0271843	< 0.0001	-0.168673	-0.242981	-0.0924239	< 0.0001	-0.178758	-0.252359	-0.104032	1,410(1,410)
GWS	SC	FA-PAT_R	0.0144	-0.0104465	-0.0202592	-0.00207224	0.5378	0.0052498	-0.0114385	0.0225859	< 0.0001	0.144793	0.0693928	0.21979	0.0014	0.134347	0.0591015	0.208378	1,410(1,410)
GWS	FSES	FA-PAT_R	0.1036	-0.0384756	-0.0852793	0.00825142	0.5944	0.0248765	-0.0662371	0.117025	< 0.0001	0.172424	0.0850452	0.259772	0.0002	0.133948	0.0604334	0.206756	1,410(1,410)
GWS	CSES	FA-PAT_R	0.4862	0.00524714	-0.00969552	0.0204749	0.7062	0.0059302	-0.0233495	0.0367145	0.0004	0.128764	0.054657	0.203297	0.0002	0.134011	0.0613578	0.208152	1,410(1,410)
GWS	ASES	FA-PAT_R	0.0756	-0.0260085	-0.0546943	0.0025081	0.642	-0.0138359	-0.0711517	0.0433909	< 0.0001	0.160536	0.0805518	0.238502	0.0004	0.134528	0.0607102	0.206768	1,410(1,410)
GWS	AP	FA-PAT_R	0.7398	0.00168372	-0.00802685	0.0118994	0.3814	0.00862324	-0.0110022	0.0288761	0.0002	0.132692	0.0586522	0.206942	< 0.0001	0.134376	0.061847	0.207781	1,410(1,410)
GWS	SC	FA-RST_L	0.7238	-0.00155562	-0.0103524	0.00701921	0.5032	-0.00565481	-0.0230363	0.01072	< 0.0001	-0.165737	-0.240892	-0.0909052	< 0.0001	-0.167293	-0.24184	-0.0926738	1,410(1,410)
GWS	FSES	FA-RST_L	< 0.0001	-0.091769	-0.137266	-0.044871	0.2686	-0.0513112	-0.140938	0.0390458	0.087	-0.0756603	-0.161524	0.0114107	< 0.0001	-0.167429	-0.240978	-0.0939701	1,410(1,410)
GWS	CSES	FA-RST_L	0.4404	-0.00584036	-0.0209513	0.00925459	0.6652	0.00664499	-0.02277	0.0367711	< 0.0001	-0.161087	-0.235639	-0.0859702	< 0.0001	-0.166928	-0.239193	-0.0941931	1,410(1,410)
GWS	ASES	FA-RST_L	0.0062	-0.0404965	-0.0696268	-0.0105847	0.9432	-0.00197452	-0.0603188	0.0554218	0.0024	-0.126547	-0.207006	-0.0465083	< 0.0001	-0.167043	-0.242241	-0.0926527	1,410(1,410)
GWS	AP	FA-RST_L	0.8248	-0.00112207	-0.0110012	0.00858572	0.8906	-0.00120898	-0.0209362	0.0184055	< 0.0001	-0.165377	-0.239472	-0.0909712	0.0002	-0.166499	-0.240279	-0.0921078	1,410(1,410)
GWS	SC	FA-RST_R	0.6232	0.00208295	-0.00665438	0.0108531	0.4612	-0.00624729	-0.0239339	0.0104566	0.0012	-0.117997	-0.19155	-0.0440736	0.0024	-0.115914	-0.18903	-0.0424442	1,410(1,410)
GWS	FSES	FA-RST_R	0.2246	-0.0286169	-0.0746497	0.0173251	0.0578	-0.0910287	-0.18225	0.00265869	0.0528	-0.0871441	-0.174097	0.000963373	0.0014	-0.115761	-0.18927	-0.0421981	1,410(1,410)
GWS	CSES	FA-RST_R	0.348	0.0071204	-0.00790234	0.0222669	0.3024	0.015786	-0.0139039	0.0471573	0.001	-0.123246	-0.198647	-0.0471674	0.0022	-0.116126	-0.191813	-0.0409923	1,410(1,410)
GWS	ASES	FA-RST_R	0.6318	0.00712407	-0.0219089	0.0355778	0.7666	0.00829431	-0.0483302	0.0642088	0.003	-0.12278	-0.20286	-0.0456722	0.003	-0.115656	-0.189556	-0.0437888	1,410(1,410)
GWS	AP	FA-RST_R	0.7594	-0.00146047	-0.0114106	0.00848594	0.1428	0.0146213	-0.00497624	0.0356399	0.0036	-0.114299	-0.189965	-0.0412568	0.0026	-0.115759	-0.190507	-0.0421615	1,410(1,410)
GWS	SC	FA-SCP	0.242	-0.00497505	-0.0144418	0.003518	0.3576	-0.00784653	-0.0260901	0.00907053	0.002	-0.113563	-0.187814	-0.0394544	0.0008	-0.118538	-0.192524	-0.0436926	1,410(1,410)
GWS	FSES	FA-SCP	0.006	-0.0628893	-0.110227	-0.0162994	0.411	-0.0393686	-0.134021	0.0528398	0.209	-0.0551304	-0.14325	0.0299259	0.0016	-0.11802	-0.190454	-0.0462654	1,410(1,410)
GWS	CSES	FA-SCP	0.1128	-0.0121547	-0.0277503	0.00271368	0.067	0.0281244	-0.00161362	0.0592316	0.0062	-0.105807	-0.181896	-0.0304386	0.0024	-0.117962	-0.192052	-0.0433066	1,410(1,410)
GWS	ASES	FA-SCP	0.0158	-0.0359458	-0.0649533	-0.0064501	0.7138	-0.0105519	-0.0688682	0.0472358	0.0432	-0.0828923	-0.161191	-0.00222092	0.0008	-0.118838	-0.191728	-0.0453482	1,410(1,410)
GWS	AP	FA-SCP	0.149	-0.00718806	-0.0176765	0.0026824	0.3318	0.00959991	-0.00962334	0.0301337	0.0034	-0.111125	-0.186631	-0.0357111	0.0018	-0.118313	-0.192993	-0.0435052	1,410(1,410)
GWS	SC	GMV-CPL_L	0.0886	0.00770888	-0.00113347	0.0175466	0.8702	-0.00144237	-0.0191648	0.0162525	< 0.0001	0.162242	0.0877031	0.23751	< 0.0001	0.169951	0.0959569	0.244111	1,449(1,449)
GWS	FSES	GMV-CPL_L	0.0002	0.07866	0.0341574	0.123874	0.3518	-0.0426094	-0.132891	0.0469631	0.0398	0.0916004	0.00428757	0.176071	< 0.0001	0.17026	0.0969674	0.242262	1,449(1,449)
GWS	CSES	GMV-CPL_L	0.2244	0.00864073	-0.00509199	0.0229792	0.8638	-0.00248168	-0.0306342	0.0254984	< 0.0001	0.160866	0.0875989	0.233952	< 0.0001	0.169507	0.0960927	0.241484	1,449(1,449)
GWS	ASES	GMV-CPL_L	0.437	0.0110944	-0.0168539	0.0396884	0.292	-0.0305304	-0.0877777	0.0254205	< 0.0001	0.158375	0.0821669	0.235704	< 0.0001	0.16947	0.0978754	0.241806	1,449(1,449)
GWS	AP	GMV-CPL_L	0.8058	0.00106085	-0.00796517	0.0101968	0.8622	0.00148615	-0.0169241	0.0195474	< 0.0001	0.169243	0.0976515	0.242457	< 0.0001	0.170304	0.0992632	0.242837	1,449(1,449)
GWS	SC	GMV-CPL_R	0.8952	-0.000587987	-0.00952601	0.00846991	0.792	0.00241165	-0.0153299	0.0205461	< 0.0001	0.164665	0.0917288	0.237819	< 0.0001	0.164077	0.0915544	0.236358	1,449(1,449)
GWS	FSES	GMV-CPL_R	0.01	0.0594709	0.0148846	0.105114	0.5138	-0.0298902	-0.120901	0.0604044	0.0164	0.104424	0.0198496	0.18991	< 0.0001	0.163895	0.0902179	0.236436	1,449(1,449)
GWS	CSES	GMV-CPL_R	0.0954	0.0117059	-0.00212208	0.0258917	0.3414	-0.0135451	-0.0415208	0.0133169	< 0.0001	0.152209	0.0787345	0.226114	< 0.0001	0.163915	0.0920179	0.236557	1,449(1,449)
GWS	ASES	GMV-CPL_R	0.3068	0.0144828	-0.0132164	0.0436352	0.2758	-0.0312863	-0.0878662	0.0247345	< 0.0001	0.14951	0.0739966	0.22725	< 0.0001	0.163993	0.0929196	0.236314	1,449(1,449)
GWS	AP	GMV-CPL_R	0.0158	0.0110143	0.00215129	0.0209743	0.5982	-0.00473312	-0.0232312	0.0126751	< 0.0001	0.15254	0.0795025	0.226493	< 0.0001	0.163554	0.0910789	0.236692	1,449(1,449)
GWS	SC	GMV-CV4-5	0.0964	-0.00743582	-0.0170891	0.00140107	0.5056	-0.00594491	-0.0243088	0.0117125	< 0.0001	0.177636	0.105815	0.249688	< 0.0001	0.1702	0.0988739	0.241877	1,449(1,449)
GWS	FSES	GMV-CV4-5	0.1622	0.0324948	-0.0130085	0.0777178	0.6924	0.0180557	-0.0725189	0.109055	0.0012	0.138216	0.0520104	0.222786	< 0.0001	0.170711	0.0980755	0.243109	1,449(1,449)
GWS	CSES	GMV-CV4-5	0.3216	0.0070156	-0.00685979	0.0211705	0.3182	0.0138482	-0.0137223	0.0418168	< 0.0001	0.163669	0.0893206	0.23859	< 0.0001	0.170685	0.0980505	0.244322	1,449(1,449)
GWS	ASES	GMV-CV4-5	0.212	-0.0180364	-0.0466721	0.010405	0.9846	-0.000267161	-0.0561118	0.0560759	< 0.0001	0.188035	0.109861	0.266696	< 0.0001	0.169999	0.0974138	0.242869	1,449(1,449)
GWS	AP	GMV-CV4-5	0.1734	0.0060799	-0.00253603	0.0156099	0.1052	0.0144936	-0.00309001	0.0336525	< 0.0001	0.164327	0.0915109	0.238071	< 0.0001	0.170407	0.0977431	0.243111	1,449(1,449)
GWS	SC	GMV-ITG_L	0.0014	-0.0142874	-0.0248044	-0.00525907	0.0052	-0.0249558	-0.0455557	-0.00720286	< 0.0001	-0.201668	-0.275599	-0.128909	< 0.0001	-0.215955	-0.289908	-0.143125	1,449(1,449)
GWS	FSES	GMV-ITG_L	0.1676	-0.0329593	-0.0796023	0.0132743	0.216	-0.0566517	-0.146416	0.0326381	< 0.0001	-0.182974	-0.268479	-0.0979531	< 0.0001	-0.215933	-0.288019	-0.144887	1,449(1,449)
GWS	CSES	GMV-ITG_L	0.8334	-0.00143058	-0.0152757	0.0121647	0.573	0.00803294	-0.0192545	0.0356846	< 0.0001	-0.214268	-0.287628	-0.141259	< 0.0001	-0.215698	-0.288495	-0.144276	1,449(1,449)
GWS	ASES	GMV-ITG_L	0.161	-0.0202782	-0.0484935	0.00805425	0.0392	-0.0593241	-0.116684	-0.00308807	< 0.0001	-0.195205	-0.274203	-0.116459	< 0.0001	-0.215483	-0.286945	-0.143572	1,449(1,449)
GWS	AP	GMV-ITG_L	0.972	0.000116509	-0.0088088	0.00877121	0.987	5.49661e-05	-0.0180856	0.0177126	< 0.0001	-0.215897	-0.288382	-0.144651	< 0.0001	-0.215781	-0.28861	-0.144741	1,449(1,449)
GWS	SC	GMV-MFPC	0.0014	-0.0143835	-0.0251465	-0.00540103	0.0732	-0.0163284	-0.0360007	0.00145186	< 0.0001	-0.192915	-0.265927	-0.121145	< 0.0001	-0.207298	-0.280187	-0.135111	1,449(1,449)
GWS	FSES	GMV-MFPC	< 0.0001	-0.0972267	-0.14312	-0.0524849	0.957	-0.00212683	-0.0920095	0.0870397	0.009	-0.110738	-0.195653	-0.0269509	< 0.0001	-0.207964	-0.280697	-0.135564	1,449(1,449)
GWS	CSES	GMV-MFPC	0.276	-0.00758237	-0.0216848	0.00639004	0.667	0.0060543	-0.021322	0.0337091	< 0.0001	-0.200701	-0.274368	-0.126275	< 0.0001	-0.208283	-0.280223	-0.135674	1,449(1,449)
GWS	ASES	GMV-MFPC	0.0158	-0.0345941	-0.0629718	-0.00650826	0.1046	-0.0461721	-0.102615	0.0107273	< 0.0001	-0.173412	-0.251404	-0.0957897	< 0.0001	-0.208006	-0.279935	-0.136683	1,449(1,449)
GWS	AP	GMV-MFPC	< 0.0001	-0.0174789	-0.0286363	-0.00802317	0.0646	0.0167124	-0.000803709	0.0364465	< 0.0001	-0.190183	-0.262586	-0.116728	< 0.0001	-0.207662	-0.280029	-0.1347	1,449(1,449)
GWS	SC	GMV-OFC_R	0.2374	-0.00530802	-0.0146257	0.00348073	0.082	-0.0159029	-0.0352009	0.00223195	0.0004	-0.135116	-0.211401	-0.0627069	0.0002	-0.140424	-0.215274	-0.0691222	1,449(1,449)
GWS	FSES	GMV-OFC_R	0.5626	-0.0135798	-0.0584924	0.0311879	0.801	-0.011628	-0.10286	0.0788957	0.006	-0.126929	-0.213373	-0.0416763	< 0.0001	-0.140509	-0.213829	-0.0673759	1,449(1,449)
GWS	CSES	GMV-OFC_R	0.2708	0.00777231	-0.00584985	0.021663	0.6632	0.00624844	-0.0208178	0.0348859	< 0.0001	-0.148284	-0.221631	-0.0746054	< 0.0001	-0.140511	-0.212805	-0.0675223	1,449(1,449)
GWS	ASES	GMV-OFC_R	0.9594	0.000537962	-0.027542	0.0288798	0.0888	-0.0496385	-0.107222	0.00640304	0.0006	-0.140894	-0.219813	-0.0639081	0.0004	-0.140356	-0.212335	-0.0675675	1,449(1,449)
GWS	AP	GMV-OFC_R	0.0046	-0.0130572	-0.0235907	-0.00417948	0.371	0.00799536	-0.00922692	0.0265825	0.0004	-0.127684	-0.202418	-0.0548957	< 0.0001	-0.140742	-0.215445	-0.068744	1,449(1,449)
GWS	SC	IFR	0.0896	0.0077062	-0.00124666	0.017538	0.2278	0.0112313	-0.00636713	0.0300778	< 0.0001	0.18689	0.11294	0.259669	< 0.0001	0.194596	0.121125	0.266904	1,439(1,439)
GWS	FSES	IFR	< 0.0001	0.123595	0.0801165	0.168436	0.9284	0.00415318	-0.0849762	0.0944318	0.0964	0.0712867	-0.0134128	0.154993	< 0.0001	0.194882	0.120718	0.266783	1,439(1,439)
GWS	CSES	IFR	0.0012	0.0218771	0.00735981	0.0372135	0.0268	-0.0305791	-0.060122	-0.00303734	< 0.0001	0.173181	0.100226	0.247308	< 0.0001	0.195058	0.123068	0.267173	1,439(1,439)
GWS	ASES	IFR	0.0254	0.033244	0.00405629	0.0626181	0.2384	0.0343173	-0.022454	0.0906928	< 0.0001	0.161786	0.0827452	0.240644	< 0.0001	0.195031	0.120536	0.268778	1,439(1,439)
GWS	AP	IFR	0.2944	-0.00474026	-0.0141633	0.00424665	0.5476	-0.0054049	-0.0234446	0.0123125	< 0.0001	0.199648	0.126415	0.271906	< 0.0001	0.194908	0.122295	0.266626	1,439(1,439)
GWS	SC	IGS-SI	< 0.0001	0.020398	0.0105647	0.0321144	0.0078	0.0239497	0.0060712	0.0452443	0.0256	0.0832433	0.0105601	0.157952	0.0056	0.103641	0.0301022	0.178202	1,451(1,451)
GWS	FSES	IGS-SI	< 0.0001	0.0965755	0.0505809	0.143677	0.8672	0.0080013	-0.0812074	0.098981	0.8544	0.00767109	-0.0786178	0.0915369	0.0056	0.104247	0.0322885	0.176513	1,451(1,451)
GWS	CSES	IGS-SI	0.0002	0.0252477	0.0110012	0.0407826	0.1222	-0.0218007	-0.0503019	0.0061697	0.0358	0.0791698	0.00473046	0.152997	0.0056	0.104417	0.0304874	0.176863	1,451(1,451)
GWS	ASES	IGS-SI	0.2128	0.0181374	-0.010023	0.0470495	0.0478	0.0564073	0.000846612	0.112884	0.0312	0.0861023	0.00887313	0.162786	0.0042	0.10424	0.0329937	0.174063	1,451(1,451)
GWS	AP	IGS-SI	0.003	0.013475	0.00466983	0.0238783	0.5226	-0.00565221	-0.0234252	0.0118979	0.0146	0.0905014	0.0184152	0.163905	0.0052	0.103976	0.0319022	0.176318	1,451(1,451)
GWS	SC	IRI-PD	< 0.0001	-0.0273996	-0.0401249	-0.0164011	0.0694	0.016652	-0.00135018	0.0366515	0.0042	-0.10401	-0.176738	-0.0310537	0.0002	-0.13141	-0.204709	-0.0580842	1,451(1,451)
GWS	FSES	IRI-PD	0.0006	-0.0847508	-0.12989	-0.0395032	0.0404	0.094888	0.00367385	0.186153	0.2802	-0.046896	-0.13249	0.0377318	< 0.0001	-0.131647	-0.204343	-0.0591585	1,451(1,451)
GWS	CSES	IRI-PD	0.2102	0.00892817	-0.00456718	0.0233946	0.5238	0.00895905	-0.0186822	0.037281	0.0002	-0.140781	-0.214083	-0.067545	0.0006	-0.131853	-0.203317	-0.0600998	1,451(1,451)
GWS	ASES	IRI-PD	< 0.0001	-0.0880433	-0.117411	-0.059616	0.0224	0.0641129	0.00756601	0.12064	0.2658	-0.0434888	-0.120153	0.0333436	0.0002	-0.131532	-0.202346	-0.0580092	1,451(1,451)
GWS	AP	IRI-PD	0.4804	-0.00316768	-0.0123601	0.00543823	0.443	-0.00677417	-0.0250526	0.0108352	0.0004	-0.128035	-0.200478	-0.0539438	0.0004	-0.131202	-0.203078	-0.0580039	1,451(1,451)
GWS	SC	IRI-PT	< 0.0001	0.0334274	0.0210763	0.0474127	0.0626	0.0169182	-0.000839232	0.036425	0.0172	0.0878504	0.0149076	0.161055	0.0014	0.121278	0.0482051	0.194657	1,451(1,451)
GWS	FSES	IRI-PT	0.0006	0.077195	0.0329894	0.122753	0.4814	-0.0326782	-0.122749	0.0587941	0.3054	0.0440938	-0.0405512	0.127581	0.0012	0.121289	0.0500438	0.193365	1,451(1,451)
GWS	CSES	IRI-PT	0.2758	0.00765243	-0.00619383	0.0216178	0.3286	-0.0139538	-0.0420254	0.0137474	0.0018	0.113283	0.0405635	0.187723	0.0006	0.120936	0.0493616	0.194908	1,451(1,451)
GWS	ASES	IRI-PT	0.0664	0.0258483	-0.00162668	0.0539747	0.83	0.00625991	-0.0495407	0.0623171	0.0146	0.0947306	0.0185382	0.173604	0.0008	0.120579	0.0495153	0.191914	1,451(1,451)
GWS	AP	IRI-PT	0.3944	0.00376707	-0.00489547	0.012958	0.2554	-0.00991207	-0.0283691	0.00736453	0.0014	0.11726	0.044891	0.191264	0.0008	0.121027	0.04844	0.194625	1,451(1,451)
GWS	SC	ReHo-ITG_L	0.1784	-0.00605674	-0.0156656	0.00284784	0.6614	-0.00386597	-0.022089	0.0137602	< 0.0001	-0.246014	-0.319281	-0.172567	< 0.0001	-0.252071	-0.324996	-0.178735	1,426(1,426)
GWS	FSES	ReHo-ITG_L	< 0.0001	-0.136428	-0.182168	-0.0899158	0.2016	0.0592636	-0.0327926	0.151043	0.0084	-0.11528	-0.201816	-0.0302544	< 0.0001	-0.251708	-0.324667	-0.178331	1,426(1,426)
GWS	CSES	ReHo-ITG_L	0.0106	-0.0186237	-0.0341241	-0.00389802	0.0164	0.0356075	0.00658201	0.066043	< 0.0001	-0.232996	-0.307175	-0.158749	< 0.0001	-0.251619	-0.324198	-0.178455	1,426(1,426)
GWS	ASES	ReHo-ITG_L	< 0.0001	-0.0590597	-0.0885448	-0.0305731	0.5972	0.0153509	-0.0409534	0.0725215	< 0.0001	-0.192309	-0.268178	-0.113452	< 0.0001	-0.251369	-0.321783	-0.178542	1,426(1,426)
GWS	AP	ReHo-ITG_L	0.665	0.00207336	-0.00712343	0.0117466	0.7462	0.00293609	-0.0159483	0.0219085	< 0.0001	-0.253868	-0.327598	-0.181081	< 0.0001	-0.251795	-0.324162	-0.178594	1,426(1,426)
GWS	SC	ReHo-ITG_R	0.3216	-0.00444431	-0.0137291	0.00456755	0.395	0.00762684	-0.00998795	0.0264296	< 0.0001	-0.295536	-0.368391	-0.22298	< 0.0001	-0.29998	-0.372104	-0.228314	1,426(1,426)
GWS	FSES	ReHo-ITG_R	< 0.0001	-0.12357	-0.170272	-0.0779507	0.9002	-0.0054966	-0.0950333	0.0853851	< 0.0001	-0.175899	-0.26094	-0.0897968	< 0.0001	-0.299469	-0.373167	-0.226055	1,426(1,426)
GWS	CSES	ReHo-ITG_R	0.0028	-0.022174	-0.0378212	-0.00765907	0.3754	0.0132	-0.0165158	0.0430361	< 0.0001	-0.276333	-0.351057	-0.20222	< 0.0001	-0.298507	-0.372305	-0.225584	1,426(1,426)
GWS	ASES	ReHo-ITG_R	0.0032	-0.0427795	-0.0716004	-0.013846	0.5788	-0.0161258	-0.0718237	0.0409032	< 0.0001	-0.25672	-0.335799	-0.179893	< 0.0001	-0.299499	-0.371816	-0.227411	1,426(1,426)
GWS	AP	ReHo-ITG_R	0.051	-0.0092611	-0.0196738	4.43426e-05	0.5048	0.00617729	-0.012331	0.0251339	< 0.0001	-0.29037	-0.362342	-0.217995	< 0.0001	-0.299631	-0.371458	-0.228037	1,426(1,426)
GWS	SC	ReHo-MOFC	0.0218	-0.0103741	-0.0204147	-0.00145341	0.0654	0.0166303	-0.00093115	0.0366628	< 0.0001	-0.214766	-0.290259	-0.142485	< 0.0001	-0.22514	-0.300532	-0.152757	1,426(1,426)
GWS	FSES	ReHo-MOFC	0.0008	-0.0740989	-0.120177	-0.0283108	0.217	0.0573357	-0.0337029	0.149219	0.0008	-0.151008	-0.237042	-0.0648468	< 0.0001	-0.225107	-0.297948	-0.150617	1,426(1,426)
GWS	CSES	ReHo-MOFC	0.0036	-0.0212167	-0.0365819	-0.00657428	0.914	-0.00164685	-0.0310845	0.0275601	< 0.0001	-0.203741	-0.280038	-0.129563	< 0.0001	-0.224958	-0.299184	-0.151878	1,426(1,426)
GWS	ASES	ReHo-MOFC	0.0282	-0.0309944	-0.0598164	-0.00301224	0.2036	0.0370246	-0.0199179	0.094412	< 0.0001	-0.193827	-0.273865	-0.115468	< 0.0001	-0.224822	-0.298086	-0.151949	1,426(1,426)
GWS	AP	ReHo-MOFC	0.0916	-0.00795032	-0.0180764	0.00113197	0.7638	-0.00279553	-0.0222888	0.01631	< 0.0001	-0.216436	-0.289973	-0.143238	< 0.0001	-0.224386	-0.297284	-0.152623	1,426(1,426)
GWS	SC	SWL	< 0.0001	0.0992472	0.0695576	0.130367	0.3502	0.00779694	-0.00879297	0.0252134	0.1854	0.0458913	-0.0214087	0.113302	< 0.0001	0.145138	0.0720323	0.217755	1,451(1,451)
GWS	FSES	SWL	< 0.0001	0.104347	0.0593672	0.150369	0.4728	-0.0332666	-0.124625	0.0557254	0.3498	0.0412448	-0.043005	0.123889	< 0.0001	0.145592	0.0719898	0.216782	1,451(1,451)
GWS	CSES	SWL	0.1946	0.00911512	-0.00474157	0.0231997	0.9668	0.000668798	-0.027553	0.028507	0.0006	0.136083	0.0624815	0.208167	0.0004	0.145198	0.0727061	0.216257	1,451(1,451)
GWS	ASES	SWL	< 0.0001	0.14159	0.111534	0.173065	0.0672	0.0519618	-0.00337536	0.107876	0.948	0.00316461	-0.0738438	0.0788132	0.0002	0.144755	0.0720305	0.21694	1,451(1,451)
GWS	AP	SWL	0.053	0.0084838	-8.75052e-05	0.0182495	0.251	-0.0102512	-0.0285044	0.00707152	0.0002	0.136623	0.0632977	0.209159	0.0002	0.145106	0.0715388	0.216463	1,451(1,451)
GWS	SC	TPQ-NS	0.0138	-0.0114033	-0.0217063	-0.00228904	0.5228	0.00586206	-0.0120094	0.0248644	0.0054	0.102606	0.0301437	0.174955	0.0124	0.0912022	0.0187909	0.162944	1,451(1,451)
GWS	FSES	TPQ-NS	< 0.0001	0.112273	0.0668851	0.158722	0.469	0.0330254	-0.0555167	0.121475	0.6418	-0.020317	-0.106419	0.0632614	0.012	0.0919564	0.0203749	0.163864	1,451(1,451)
GWS	CSES	TPQ-NS	0.1066	0.0112815	-0.00233591	0.0257021	0.6188	-0.00713748	-0.0350093	0.0201049	0.03	0.0810431	0.00683353	0.154772	0.0114	0.0923246	0.0202491	0.163666	1,451(1,451)
GWS	ASES	TPQ-NS	0.0008	0.0507472	0.0227352	0.0794964	0.3472	0.0264891	-0.0288033	0.0839295	0.2948	0.0410461	-0.0381992	0.117977	0.0128	0.0917933	0.0181475	0.164851	1,451(1,451)
GWS	AP	TPQ-NS	0.9148	-0.000433287	-0.0094047	0.00870034	0.9846	0.000245335	-0.0178178	0.0182693	0.0124	0.0921784	0.0191489	0.165126	0.012	0.0917451	0.0192	0.163159	1,451(1,451)
GWS	SC	TPQ-RD	< 0.0001	0.0406476	0.0264413	0.0563013	0.0588	-0.0171459	-0.0369321	0.000724284	< 0.0001	-0.181981	-0.253797	-0.110713	< 0.0001	-0.141333	-0.21355	-0.069675	1,451(1,451)
GWS	FSES	TPQ-RD	0.3062	-0.0238344	-0.0690888	0.0215869	0.0146	-0.110573	-0.201218	-0.0216532	0.0066	-0.117994	-0.201228	-0.0330809	< 0.0001	-0.141828	-0.213162	-0.0689793	1,451(1,451)
GWS	CSES	TPQ-RD	0.0198	-0.0164772	-0.0306417	-0.00277813	0.504	-0.00930339	-0.0369255	0.0188918	0.001	-0.124667	-0.197571	-0.050563	< 0.0001	-0.141144	-0.21339	-0.0680616	1,451(1,451)
GWS	ASES	TPQ-RD	0.7102	0.00508067	-0.0231297	0.0330355	0.2164	-0.0361112	-0.094336	0.0205718	0.0002	-0.147111	-0.224934	-0.0700215	< 0.0001	-0.14203	-0.214576	-0.0703466	1,451(1,451)
GWS	AP	TPQ-RD	0.5664	-0.0025966	-0.0117919	0.00610158	0.0516	-0.0170465	-0.0367625	0.000140604	0.0002	-0.138513	-0.212584	-0.0637142	0.0002	-0.141109	-0.214397	-0.0670961	1,451(1,451)
GWS	SC	WM	0.4784	0.00310448	-0.00551526	0.0122493	0.6746	-0.00370411	-0.0216206	0.0138513	< 0.0001	0.195161	0.119968	0.270631	< 0.0001	0.198265	0.123816	0.273113	1,381(1,381)
GWS	FSES	WM	0.0002	0.0883663	0.0423358	0.135218	0.9234	0.00466903	-0.086874	0.0952965	0.0128	0.110439	0.0244873	0.198801	< 0.0001	0.198805	0.12525	0.274301	1,381(1,381)
GWS	CSES	WM	0.0954	0.0122668	-0.0020713	0.0275472	0.846	0.00287128	-0.0262875	0.032153	< 0.0001	0.186801	0.111194	0.262094	< 0.0001	0.199068	0.124831	0.273726	1,381(1,381)
GWS	ASES	WM	0.3088	0.0147255	-0.0134647	0.0431125	0.8636	-0.00509659	-0.0623538	0.0520346	0.0002	0.183317	0.104775	0.263372	0.0002	0.198042	0.124648	0.273742	1,381(1,381)
GWS	AP	WM	0.2002	-0.00539527	-0.0145196	0.00282147	0.5192	0.00552332	-0.0114857	0.0230686	< 0.0001	0.203705	0.129429	0.278129	< 0.0001	0.19831	0.123798	0.273132	1,381(1,381)
The significant mediation and moderation (Pc < 0.05, uncorrected P < 0.05/5/ (11+7.63) = 5.36× 10-4) are shown in red and bold. The mediation and moderation effects reaching a norminal P < 0.05 are shown in black and bold. β, regression coeffecient. Abbreviation: AP, air pollution; ASES, adverse socioeconomic status; BFI, big five inventory; BFI-O, openness; BIS, Barratt impulsiveness scale; BIS-…

## Sheet: Supplementary Table 10
Supplementary Table 10. Full statistics of mediation and moderation of IDPs on the association between GWS and behavioral phenotypes in causal mediation analysis (CMA).
Treatmeant (X)	Mediator (M)	Outcome (Y)	Mediation (Indirect) effect				Moderation effect (GWS × Mediator)				Direct effect				Total effect				N
			P	β	95% LCI	95% UCI	P	β	95% LCI	95% UCI	P	β	95% LCI	95% UCI	P	β	95% LCI	95% UCI	OC(non-OC)
GWS	FA-CBT_L	BFI-O	0.0214	0.00616384	0.000783914	0.0128709	0.037	0.0111645	0.000561289	0.0243784	< 0.0001	0.308637	0.240781	0.377345	< 0.0001	0.314801	0.246745	0.383506	1,574(1,574)
GWS	FA-CST_R	BFI-O	0.018	0.0062214	0.000955607	0.0129424	0.143	0.00790762	-0.00267783	0.0203984	< 0.0001	0.308379	0.239105	0.379514	< 0.0001	0.314601	0.245681	0.385929	1,574(1,574)
GWS	FA-DRTT_R	BFI-O	0.123	0.00467928	-0.00133631	0.0115633	0.0214	0.0139056	0.00195687	0.0283209	< 0.0001	0.310494	0.240638	0.38037	< 0.0001	0.315174	0.245881	0.384837	1,574(1,574)
GWS	FA-PAT_R	BFI-O	0.2878	-0.00255437	-0.0079802	0.00213628	0.3688	-0.00435723	-0.0153596	0.00516949	< 0.0001	0.316617	0.246649	0.385253	< 0.0001	0.314063	0.24397	0.383215	1,574(1,574)
GWS	FA-RST_L	BFI-O	0.0622	0.00536007	-0.000262592	0.0121995	0.0248	0.0133171	0.00190681	0.0277858	< 0.0001	0.30891	0.239081	0.37863	< 0.0001	0.31427	0.244722	0.383624	1,574(1,574)
GWS	FA-RST_R	BFI-O	0.0234	0.00445303	0.000385689	0.0102066	0.0292	0.0087747	0.000723	0.0200212	< 0.0001	0.309992	0.24042	0.379838	< 0.0001	0.314445	0.244825	0.384046	1,574(1,574)
GWS	FA-SCP	BFI-O	0.5164	-0.00123762	-0.00561434	0.00242635	0.2366	0.00457493	-0.0028403	0.0140989	< 0.0001	0.316382	0.247134	0.385154	< 0.0001	0.315144	0.24576	0.383693	1,574(1,574)
GWS	GMV-CPL_L	BFI-O	0.8834	0.000384573	-0.00558914	0.00639233	0.308	-0.00600863	-0.0187866	0.00541277	< 0.0001	0.31433	0.245085	0.383569	< 0.0001	0.314714	0.24593	0.383758	1,613(1,613)
GWS	GMV-CPL_R	BFI-O	0.8242	0.000665875	-0.00518591	0.00668449	0.5386	-0.00351016	-0.0159113	0.00791372	< 0.0001	0.314175	0.245182	0.382993	< 0.0001	0.314841	0.246185	0.383352	1,613(1,613)
GWS	GMV-CV4-5	BFI-O	0.4708	0.00231794	-0.00388089	0.00907094	0.1024	-0.0103496	-0.0248035	0.0022612	< 0.0001	0.312662	0.243449	0.380954	< 0.0001	0.31498	0.245839	0.383614	1,613(1,613)
GWS	GMV-ITG_L	BFI-O	0.43	-0.00324897	-0.0117501	0.00505253	0.0812	0.0143418	-0.00161001	0.0320635	< 0.0001	0.317748	0.250213	0.385817	< 0.0001	0.314499	0.247808	0.382143	1,613(1,613)
GWS	GMV-MFPC	BFI-O	0.222	0.00462554	-0.00283616	0.0126931	0.011	0.019431	0.00436617	0.037144	< 0.0001	0.310707	0.241975	0.379433	< 0.0001	0.315332	0.246287	0.383239	1,613(1,613)
GWS	GMV-OFC_R	BFI-O	0.5504	0.00155696	-0.00359787	0.00712419	0.0228	0.0118978	0.00146485	0.024989	< 0.0001	0.313583	0.244551	0.383421	< 0.0001	0.31514	0.246581	0.385197	1,613(1,613)
GWS	ReHo-ITG_L	BFI-O	0.7624	0.00151405	-0.00859926	0.0117419	0.8034	-0.00269635	-0.0230519	0.0175993	< 0.0001	0.314852	0.245969	0.384859	< 0.0001	0.316366	0.247397	0.385614	1,590(1,590)
GWS	ReHo-ITG_R	BFI-O	0.162	0.00769747	-0.00322472	0.0190983	0.355	0.00996017	-0.0111517	0.0319859	< 0.0001	0.309329	0.238991	0.378115	< 0.0001	0.317027	0.247536	0.384565	1,590(1,590)
GWS	ReHo-MOFC	BFI-O	0.0546	0.00813168	-0.000179368	0.0172682	0.0836	0.0145447	-0.00202148	0.0334599	< 0.0001	0.308608	0.238883	0.377316	< 0.0001	0.31674	0.247981	0.384856	1,590(1,590)
GWS	FA-CBT_L	BIS-CI	0.1284	-0.0040669	-0.0105107	0.00113498	0.978	-7.73202e-05	-0.0112083	0.0111154	< 0.0001	-0.171748	-0.2414	-0.102089	< 0.0001	-0.175815	-0.245496	-0.106293	1,574(1,574)
GWS	FA-CST_R	BIS-CI	0.14	-0.00400232	-0.0103442	0.0013729	0.8944	0.000743094	-0.0101162	0.0121175	< 0.0001	-0.173458	-0.243223	-0.103953	< 0.0001	-0.17746	-0.247194	-0.107903	1,574(1,574)
GWS	FA-DRTT_R	BIS-CI	0.2706	-0.00340891	-0.0101211	0.00261709	0.1028	0.0100213	-0.00183275	0.0242497	< 0.0001	-0.173201	-0.243324	-0.103168	< 0.0001	-0.17661	-0.246082	-0.106788	1,574(1,574)
GWS	FA-PAT_R	BIS-CI	0.2202	-0.00301848	-0.00872094	0.00180862	0.3556	0.0045279	-0.00497319	0.0156477	< 0.0001	-0.173742	-0.244024	-0.103199	< 0.0001	-0.17676	-0.246341	-0.106777	1,574(1,574)
GWS	FA-RST_L	BIS-CI	0.8922	-0.000408882	-0.00656574	0.00565756	0.4432	0.004511	-0.00733736	0.0170507	< 0.0001	-0.176173	-0.24725	-0.106074	< 0.0001	-0.176582	-0.246857	-0.1068	1,574(1,574)
GWS	FA-RST_R	BIS-CI	0.3496	-0.00192165	-0.00673211	0.00208193	0.555	0.00240321	-0.00600873	0.0117183	< 0.0001	-0.174549	-0.243983	-0.104745	< 0.0001	-0.176471	-0.245449	-0.106924	1,574(1,574)
GWS	FA-SCP	BIS-CI	0.197	0.00247828	-0.00117085	0.00727028	0.1602	0.00540164	-0.00211295	0.0153848	< 0.0001	-0.179151	-0.249524	-0.110019	< 0.0001	-0.176673	-0.246713	-0.107441	1,574(1,574)
GWS	GMV-CPL_L	BIS-CI	0.2808	-0.00313623	-0.00939687	0.00266913	0.5284	0.00372941	-0.00799299	0.0162793	< 0.0001	-0.170018	-0.239939	-0.101083	< 0.0001	-0.173155	-0.242884	-0.104626	1,613(1,613)
GWS	GMV-CPL_R	BIS-CI	0.1204	-0.00450998	-0.0110908	0.00120526	0.346	-0.00555934	-0.0183289	0.00622745	< 0.0001	-0.168742	-0.237071	-0.0992131	< 0.0001	-0.173252	-0.24156	-0.103777	1,613(1,613)
GWS	GMV-CV4-5	BIS-CI	0.0204	-0.00743342	-0.0151088	-0.00109147	0.2298	0.00766714	-0.00468293	0.0216005	< 0.0001	-0.165338	-0.234424	-0.0966753	< 0.0001	-0.172771	-0.241446	-0.104874	1,613(1,613)
GWS	GMV-MFPC	BIS-CI	0.0008	0.0119679	0.00417514	0.0210983	0.2572	-0.0086225	-0.0245705	0.00616341	< 0.0001	-0.185011	-0.254248	-0.117355	< 0.0001	-0.173043	-0.242349	-0.105099	1,613(1,613)
GWS	GMV-OFC_R	BIS-CI	0.0026	0.00801614	0.00241569	0.0152293	0.4324	-0.00408486	-0.0156354	0.00627452	< 0.0001	-0.181283	-0.249504	-0.113322	< 0.0001	-0.173267	-0.241608	-0.105056	1,613(1,613)
GWS	ReHo-ITG_L	BIS-CI	0.4636	-0.00372044	-0.0141989	0.00632746	0.85	0.00210141	-0.0178465	0.0228933	< 0.0001	-0.168075	-0.238572	-0.0974655	< 0.0001	-0.171796	-0.241375	-0.101742	1,590(1,590)
GWS	ReHo-ITG_R	BIS-CI	0.34	-0.00531996	-0.0165402	0.00545749	0.9084	0.0011243	-0.0206497	0.0229783	< 0.0001	-0.166782	-0.237179	-0.0969429	< 0.0001	-0.172102	-0.241071	-0.102862	1,590(1,590)
GWS	ReHo-MOFC	BIS-CI	0.0658	-0.0078459	-0.0170811	0.000467094	0.1354	-0.012866	-0.0311148	0.00384612	< 0.0001	-0.163254	-0.234755	-0.0923861	< 0.0001	-0.1711	-0.243263	-0.100796	1,590(1,590)
GWS	GMV-ITG_L	BIS-CI	< 0.0001	0.0189205	0.00990216	0.0296207	0.6126	-0.00434342	-0.0211572	0.0119431	< 0.0001	-0.192166	-0.259527	-0.124461	< 0.0001	-0.173246	-0.240167	-0.104734	1,613(1,613)
GWS	FA-CBT_L	EC	0.6768	-0.00108709	-0.0064701	0.00389439	0.0184	0.0122273	0.00213488	0.0241542	< 0.0001	0.142989	0.0820738	0.203918	< 0.0001	0.141902	0.0818702	0.202923	2,122(2,122)
GWS	FA-CST_R	EC	0.7688	0.000582632	-0.00354671	0.00479812	0.6344	0.00188796	-0.00610232	0.0105656	< 0.0001	0.141514	0.0811401	0.201455	< 0.0001	0.142097	0.081645	0.202126	2,122(2,122)
GWS	FA-DRTT_R	EC	0.1006	-0.00372489	-0.0090297	0.000700301	0.41	0.0037731	-0.00530537	0.0137844	< 0.0001	0.145928	0.0855971	0.206083	< 0.0001	0.142203	0.0819277	0.201943	2,122(2,122)
GWS	FA-PAT_R	EC	0.0052	0.00597177	0.00155617	0.0117199	0.2458	-0.00504815	-0.0145507	0.00339841	< 0.0001	0.136267	0.0764077	0.196608	< 0.0001	0.142239	0.082381	0.202522	2,122(2,122)
GWS	FA-RST_L	EC	0.0338	-0.00541892	-0.0112015	-0.000468763	0.379	0.00465741	-0.00582545	0.015836	< 0.0001	0.147649	0.0864152	0.209171	< 0.0001	0.14223	0.080629	0.204266	2,122(2,122)
GWS	FA-RST_R	EC	0.003	-0.00585561	-0.0112585	-0.00169863	0.9396	0.000296808	-0.0078894	0.00842645	< 0.0001	0.148314	0.0875322	0.207509	< 0.0001	0.142459	0.0816624	0.201898	2,122(2,122)
GWS	FA-SCP	EC	0.0042	-0.00568013	-0.0110697	-0.00137365	0.7266	0.00147593	-0.00672708	0.0102673	< 0.0001	0.147169	0.0872742	0.20809	< 0.0001	0.141489	0.0816161	0.202373	2,122(2,122)
GWS	GMV-CPL_L	EC	0.005	0.00735389	0.00208427	0.0137045	0.2098	0.00664388	-0.00385363	0.018195	< 0.0001	0.153864	0.095026	0.213104	< 0.0001	0.161218	0.102505	0.221112	2,177(2,177)
GWS	GMV-CPL_R	EC	0.0084	0.00725976	0.00174521	0.0136591	0.6546	0.00247737	-0.00867061	0.0137172	< 0.0001	0.153646	0.0951678	0.211776	< 0.0001	0.160906	0.102779	0.218888	2,177(2,177)
GWS	GMV-CV4-5	EC	< 0.0001	0.012697	0.00648827	0.0200102	0.0438	-0.0109028	-0.0230752	-0.000341096	< 0.0001	0.148437	0.0894743	0.207114	< 0.0001	0.161134	0.102019	0.219316	2,177(2,177)
GWS	GMV-ITG_L	EC	0.0116	-0.00776101	-0.0147811	-0.00171679	0.1358	0.00896441	-0.00291504	0.0219335	< 0.0001	0.169349	0.110956	0.228023	< 0.0001	0.161588	0.103261	0.219643	2,177(2,177)
GWS	GMV-MFPC	EC	0.006	-0.0089485	-0.0162021	-0.00243746	0.0694	0.0117119	-0.000944715	0.0262874	< 0.0001	0.169847	0.110776	0.22888	< 0.0001	0.160899	0.101858	0.218871	2,177(2,177)
GWS	GMV-OFC_R	EC	0.0192	-0.00498893	-0.0104331	-0.000668572	0.0362	0.00927067	0.000586673	0.0200851	< 0.0001	0.165718	0.107101	0.224135	< 0.0001	0.160729	0.101881	0.218734	2,177(2,177)
GWS	ReHo-ITG_L	EC	0.572	-0.00232187	-0.0103861	0.00573992	0.0702	0.014799	-0.0011467	0.0323849	< 0.0001	0.155655	0.0953672	0.215201	< 0.0001	0.153333	0.0927721	0.212723	2,142(2,142)
GWS	ReHo-ITG_R	EC	0.4096	-0.00380688	-0.0132293	0.00525917	0.6862	-0.0038369	-0.0223542	0.0145103	< 0.0001	0.156978	0.0967419	0.216809	< 0.0001	0.153171	0.0941193	0.211782	2,142(2,142)
GWS	ReHo-MOFC	EC	0.0438	0.00795525	0.000240066	0.0162482	0.2482	0.00886658	-0.00621085	0.0246615	< 0.0001	0.145244	0.0862796	0.204653	< 0.0001	0.153199	0.0944793	0.212286	2,142(2,142)
GWS	FA-CBT_L	IFR	0.1148	0.00384187	-0.000911568	0.00921766	0.693	0.00192732	-0.00783804	0.0121106	< 0.0001	0.13749	0.0783525	0.197214	< 0.0001	0.141332	0.0824628	0.20109	2,188(2,188)
GWS	FA-CST_R	IFR	0.8718	0.00031913	-0.00393952	0.00467546	0.593	0.002231	-0.00589003	0.0108756	< 0.0001	0.141504	0.0813728	0.200397	< 0.0001	0.141824	0.0822304	0.200951	2,188(2,188)
GWS	FA-DRTT_R	IFR	0.2026	0.00280306	-0.00147959	0.00780334	0.2932	0.00457485	-0.00408794	0.0142243	< 0.0001	0.138862	0.0782785	0.198039	< 0.0001	0.141665	0.0811289	0.201032	2,188(2,188)
GWS	FA-PAT_R	IFR	0.2804	-0.00245083	-0.00733196	0.00200426	0.8232	-0.00104488	-0.0104282	0.00791462	< 0.0001	0.143657	0.0847811	0.20408	< 0.0001	0.141206	0.0823718	0.201618	2,188(2,188)
GWS	FA-RST_L	IFR	0.0016	0.00778076	0.00239198	0.0140115	0.6928	0.00213578	-0.00821572	0.01296	< 0.0001	0.133828	0.0738986	0.192482	< 0.0001	0.141609	0.0818666	0.199841	2,188(2,188)
GWS	FA-RST_R	IFR	0.5596	0.00108293	-0.0026653	0.00522557	0.2136	0.0047078	-0.00289755	0.0132734	< 0.0001	0.140895	0.081047	0.199863	< 0.0001	0.141978	0.0821897	0.200988	2,188(2,188)
GWS	FA-SCP	IFR	< 0.0001	0.00806948	0.00336307	0.014102	0.8926	-0.000535694	-0.0092165	0.00793889	< 0.0001	0.133087	0.0732696	0.192477	< 0.0001	0.141157	0.0815576	0.20088	2,188(2,188)
GWS	GMV-CPL_L	IFR	0.517	0.00167065	-0.00334504	0.00703443	0.7624	-0.00153194	-0.0118369	0.00847515	< 0.0001	0.137045	0.0770416	0.196721	< 0.0001	0.138716	0.0788191	0.198291	2,243(2,243)
GWS	GMV-CPL_R	IFR	0.3952	0.00222446	-0.00288824	0.00771206	0.883	-0.000762432	-0.0111827	0.0096699	< 0.0001	0.137165	0.0793353	0.194717	< 0.0001	0.139389	0.0821677	0.196753	2,243(2,243)
GWS	GMV-CV4-5	IFR	0.4636	-0.00178845	-0.0068638	0.00297333	0.8996	-0.00057306	-0.010384	0.00929889	< 0.0001	0.141004	0.0815318	0.199843	< 0.0001	0.139215	0.0797468	0.197779	2,243(2,243)
GWS	GMV-ITG_L	IFR	0.0914	0.00547875	-0.000906973	0.0122646	0.0786	-0.0115222	-0.0253823	0.00130703	< 0.0001	0.133867	0.0752206	0.191643	< 0.0001	0.139346	0.0808672	0.19673	2,243(2,243)
GWS	GMV-MFPC	IFR	< 0.0001	0.017246	0.0096605	0.025901	0.4446	-0.005251	-0.0189553	0.00830489	0.0002	0.122072	0.0625447	0.180956	< 0.0001	0.139318	0.0806693	0.197678	2,243(2,243)
GWS	GMV-OFC_R	IFR	0.6136	0.00124985	-0.00364845	0.00636056	0.2138	-0.00603807	-0.0169017	0.00352101	< 0.0001	0.138209	0.079942	0.196115	< 0.0001	0.139459	0.0811596	0.197482	2,243(2,243)
GWS	ReHo-ITG_L	IFR	0.0028	0.0123075	0.00416165	0.0210697	0.5584	0.0046034	-0.0114248	0.0207289	< 0.0001	0.127092	0.0678101	0.187121	< 0.0001	0.1394	0.0811651	0.198379	2,208(2,208)
GWS	ReHo-ITG_R	IFR	0.0004	0.0160132	0.00691367	0.025713	0.7914	-0.0024835	-0.0203394	0.015249	< 0.0001	0.123801	0.0624712	0.183815	< 0.0001	0.139815	0.0796497	0.199145	2,208(2,208)
GWS	ReHo-MOFC	IFR	0.0012	0.0118984	0.00458422	0.0199476	0.3312	0.00719399	-0.00735622	0.0226243	< 0.0001	0.1277	0.0675137	0.187931	< 0.0001	0.139599	0.0790563	0.199277	2,208(2,208)
GWS	FA-CBT_L	IGS-SI	0.4524	0.00202926	-0.0034322	0.00810704	0.7616	0.00164851	-0.00913127	0.0129513	0.0002	0.124938	0.0563091	0.195119	0.0002	0.126967	0.0581491	0.196651	1,574(1,574)
GWS	FA-CST_R	IGS-SI	0.1632	0.00376197	-0.0013906	0.00974668	0.4454	0.00409407	-0.00644643	0.0155853	< 0.0001	0.122547	0.0523624	0.191324	< 0.0001	0.126309	0.0570404	0.194891	1,574(1,574)
GWS	FA-DRTT_R	IGS-SI	0.3882	-0.00265045	-0.00922606	0.00348831	0.289	-0.00648235	-0.0198828	0.00592632	0.0002	0.128827	0.0575147	0.200625	0.0002	0.126177	0.0544501	0.197672	1,574(1,574)
GWS	FA-PAT_R	IGS-SI	0.9536	0.000132872	-0.00477419	0.00519485	0.7928	0.00121614	-0.0086551	0.0114444	0.0004	0.126729	0.056985	0.196464	0.0004	0.126862	0.0573473	0.196025	1,574(1,574)
GWS	FA-RST_L	IGS-SI	0.459	-0.00221022	-0.00864258	0.00381295	0.4602	-0.00434449	-0.016973	0.00756666	0.0004	0.128673	0.0565306	0.198385	0.0008	0.126463	0.0550792	0.195985	1,574(1,574)
GWS	FA-RST_R	IGS-SI	0.2766	-0.0022164	-0.00728628	0.00182408	0.8076	-0.000974865	-0.0100183	0.00743322	0.0002	0.128681	0.0589092	0.19784	0.0002	0.126465	0.0566097	0.195822	1,574(1,574)
GWS	FA-SCP	IGS-SI	0.1198	-0.00304642	-0.00829462	0.000724618	0.1922	-0.00513149	-0.0149109	0.00240433	0.0006	0.129562	0.0613127	0.200286	0.0006	0.126516	0.0582974	0.197122	1,574(1,574)
GWS	GMV-CPL_L	IGS-SI	0.034	0.00636218	0.000439104	0.0132988	0.263	-0.00661467	-0.0195926	0.00491357	0.0006	0.121132	0.0525195	0.190296	0.0002	0.127494	0.0585107	0.196506	1,613(1,613)
GWS	GMV-CPL_R	IGS-SI	0.0074	0.00801217	0.00197894	0.0154501	0.3434	-0.00552554	-0.0180655	0.00613576	0.0004	0.119384	0.0500189	0.190313	< 0.0001	0.127396	0.0584041	0.198092	1,613(1,613)
GWS	GMV-CV4-5	IGS-SI	< 0.0001	0.0141639	0.00673072	0.0232168	0.4132	-0.0051936	-0.0189141	0.00756992	0.0016	0.113069	0.0435389	0.182179	0.0004	0.127233	0.0579394	0.196561	1,613(1,613)
GWS	GMV-ITG_L	IGS-SI	0.0036	-0.0118563	-0.0214053	-0.0036575	0.6834	0.00340608	-0.0132108	0.0203243	< 0.0001	0.140004	0.0712135	0.209861	0.0004	0.128147	0.059866	0.197362	1,613(1,613)
GWS	GMV-MFPC	IGS-SI	0.1494	-0.00556999	-0.0138008	0.00188006	0.0242	0.0170813	0.00219432	0.0343043	< 0.0001	0.133282	0.0634553	0.202248	< 0.0001	0.127712	0.0594031	0.196396	1,613(1,613)
GWS	GMV-OFC_R	IGS-SI	0.1776	-0.00356788	-0.00974233	0.00146817	0.1506	0.00776427	-0.00262348	0.0198931	0.0002	0.131167	0.0619441	0.200311	0.0004	0.127599	0.0578608	0.196275	1,613(1,613)
GWS	ReHo-ITG_L	IGS-SI	0.1538	0.00743084	-0.00284091	0.0183501	0.1414	0.0150056	-0.00485954	0.036525	0.0018	0.109847	0.0399076	0.178519	0.0004	0.117278	0.0485374	0.184621	1,590(1,590)
GWS	ReHo-ITG_R	IGS-SI	0.029	0.0119305	0.00117279	0.023448	0.5874	0.00594845	-0.015943	0.027584	0.0048	0.104748	0.0325766	0.174691	0.0012	0.116679	0.0470549	0.184992	1,590(1,590)
GWS	ReHo-MOFC	IGS-SI	0.199	0.00559409	-0.00279084	0.0148056	0.3152	0.00866906	-0.00829673	0.0267335	0.002	0.110853	0.0399229	0.181281	0.0014	0.116448	0.0465268	0.18625	1,590(1,590)
GWS	FA-CBT_L	IRI-PD	0.0878	0.00464063	-0.000734621	0.0111698	0.1608	-0.0073532	-0.0196185	0.00306492	0.0002	-0.127758	-0.198187	-0.0579689	0.0004	-0.123118	-0.193505	-0.052726	1,574(1,574)
GWS	FA-CST_R	IRI-PD	0.4996	-0.00181028	-0.00770418	0.00350288	0.1056	-0.00885321	-0.0218575	0.00171585	0.0002	-0.121086	-0.191105	-0.0517642	0.0002	-0.122896	-0.192512	-0.053638	1,574(1,574)
GWS	FA-DRTT_R	IRI-PD	0.6164	0.0015364	-0.00451206	0.00807815	0.111	-0.00978994	-0.0237178	0.00238485	< 0.0001	-0.125139	-0.19518	-0.0564322	< 0.0001	-0.123603	-0.193278	-0.0547361	1,574(1,574)
GWS	FA-PAT_R	IRI-PD	0.052	-0.00475164	-0.0108906	3.36929e-05	0.4482	-0.00375121	-0.0146624	0.0062172	0.001	-0.117673	-0.187284	-0.0495292	0.0008	-0.122425	-0.192976	-0.054142	1,574(1,574)
GWS	FA-RST_L	IRI-PD	0.1104	0.00474743	-0.00106628	0.0117141	0.212	-0.00750003	-0.0207592	0.00410456	0.0002	-0.128738	-0.198921	-0.0601801	0.0004	-0.123991	-0.193979	-0.0559279	1,574(1,574)
GWS	FA-RST_R	IRI-PD	0.2778	0.00220579	-0.00171629	0.00699081	0.934	0.00033695	-0.00831922	0.00925686	0.0002	-0.125406	-0.195847	-0.0553865	0.0002	-0.1232	-0.193022	-0.0528911	1,574(1,574)
GWS	FA-SCP	IRI-PD	0.0356	0.00408115	0.000185149	0.00959294	0.325	-0.00386496	-0.0133788	0.00382448	0.0002	-0.127326	-0.196331	-0.0573364	0.0008	-0.123245	-0.192626	-0.0532094	1,574(1,574)
GWS	GMV-CPL_L	IRI-PD	0.0022	-0.00928947	-0.0171048	-0.00309208	0.633	0.00282247	-0.00915879	0.0153847	0.0008	-0.119794	-0.189551	-0.0500424	0.0004	-0.129083	-0.197806	-0.0591376	1,613(1,613)
GWS	GMV-CPL_R	IRI-PD	0.0002	-0.0114311	-0.0197957	-0.0047023	0.8974	-0.000813327	-0.0132605	0.0112062	0.0006	-0.118166	-0.187229	-0.0489537	0.0002	-0.129597	-0.198765	-0.0604222	1,613(1,613)
GWS	GMV-CV4-5	IRI-PD	0.0076	-0.00855468	-0.0165107	-0.00212786	0.2682	-0.00705882	-0.0209109	0.00560248	0.0004	-0.120669	-0.189834	-0.0532911	0.0004	-0.129223	-0.198696	-0.0614539	1,613(1,613)
GWS	GMV-ITG_L	IRI-PD	0.0004	0.0143572	0.00573114	0.0242133	0.4462	0.0063502	-0.00997645	0.0232282	< 0.0001	-0.144187	-0.212844	-0.0766639	0.0004	-0.129829	-0.198515	-0.0624558	1,613(1,613)
GWS	GMV-MFPC	IRI-PD	0.0054	0.0105276	0.00300201	0.0193551	0.869	0.00133562	-0.0135007	0.0168976	< 0.0001	-0.139798	-0.209084	-0.072744	0.0004	-0.12927	-0.198486	-0.0617132	1,613(1,613)
GWS	GMV-OFC_R	IRI-PD	< 0.0001	0.0100362	0.0038483	0.0178099	0.0492	-0.0104355	-0.0234726	-5.11687e-05	0.0004	-0.139725	-0.209031	-0.0699277	0.0008	-0.129689	-0.198987	-0.0601593	1,613(1,613)
GWS	ReHo-ITG_L	IRI-PD	0.5958	-0.00268003	-0.0130577	0.00745779	0.1646	-0.0140981	-0.034535	0.00584231	0.0002	-0.14082	-0.211433	-0.072147	< 0.0001	-0.1435	-0.21303	-0.0752436	1,590(1,590)
GWS	ReHo-ITG_R	IRI-PD	0.4566	0.00408205	-0.0068491	0.0154365	0.376	-0.0100154	-0.032747	0.0113641	< 0.0001	-0.146942	-0.215723	-0.0753932	< 0.0001	-0.14286	-0.21115	-0.0723971	1,590(1,590)
GWS	ReHo-MOFC	IRI-PD	0.0288	-0.00942242	-0.0187364	-0.000926937	0.5466	0.00515483	-0.0114808	0.022795	0.0002	-0.134152	-0.202729	-0.0644964	< 0.0001	-0.143575	-0.211786	-0.0740059	1,590(1,590)
GWS	FA-CBT_L	IRI-PT	0.3364	0.00257737	-0.0027592	0.00860705	0.2316	-0.00659984	-0.0192527	0.00413178	0.0002	0.159674	0.090118	0.230241	< 0.0001	0.162251	0.0926712	0.232821	1,574(1,574)
GWS	FA-CST_R	IRI-PT	0.4274	0.00210205	-0.00317584	0.00797073	0.0036	-0.0158795	-0.030214	-0.00476635	< 0.0001	0.16033	0.0899069	0.230022	< 0.0001	0.162432	0.0928594	0.23155	1,574(1,574)
GWS	FA-DRTT_R	IRI-PT	0.3114	0.00311837	-0.00291827	0.00988331	0.0386	-0.0128058	-0.0274471	-0.000606146	< 0.0001	0.159925	0.0892489	0.230518	< 0.0001	0.163044	0.0921215	0.233062	1,574(1,574)
GWS	FA-PAT_R	IRI-PT	0.8526	0.000429218	-0.00466181	0.00570971	0.6496	0.00227768	-0.00740123	0.0129192	< 0.0001	0.162709	0.0933591	0.233374	< 0.0001	0.163139	0.0939655	0.232871	1,574(1,574)
GWS	FA-RST_L	IRI-PT	0.4244	-0.00237558	-0.00883184	0.00335453	0.282	-0.00654843	-0.0197694	0.00517353	< 0.0001	0.164615	0.0949209	0.234627	< 0.0001	0.162239	0.0929898	0.232354	1,574(1,574)
GWS	FA-RST_R	IRI-PT	0.9192	-0.000208289	-0.00456891	0.00408278	0.1052	-0.00661001	-0.0174173	0.00126064	< 0.0001	0.163335	0.092278	0.233978	< 0.0001	0.163127	0.0922153	0.233998	1,574(1,574)
GWS	FA-SCP	IRI-PT	0.5146	0.00126442	-0.0027117	0.0056802	0.9512	-0.000255124	-0.00877978	0.00811861	< 0.0001	0.160743	0.0917337	0.230043	< 0.0001	0.162008	0.0932708	0.230839	1,574(1,574)
GWS	GMV-CPL_L	IRI-PT	0.8372	0.000576523	-0.00552586	0.00664756	0.4988	-0.00409826	-0.0170214	0.007843	< 0.0001	0.154982	0.0856516	0.22582	< 0.0001	0.155558	0.0862677	0.22654	1,613(1,613)
GWS	GMV-CPL_R	IRI-PT	0.852	-0.000573252	-0.00681417	0.00554407	0.4516	-0.0044317	-0.0169743	0.00723139	< 0.0001	0.156262	0.0867343	0.226149	< 0.0001	0.155689	0.0861658	0.225307	1,613(1,613)
GWS	GMV-CV4-5	IRI-PT	0.137	0.00476461	-0.00154789	0.0118266	0.714	-0.00231383	-0.015694	0.0106136	< 0.0001	0.15177	0.0811325	0.221825	< 0.0001	0.156534	0.0866209	0.226612	1,613(1,613)
GWS	GMV-ITG_L	IRI-PT	0.0126	-0.0103428	-0.0194899	-0.00203209	0.2432	0.00969882	-0.0066145	0.0271847	< 0.0001	0.166678	0.0988183	0.23672	< 0.0001	0.156336	0.0886191	0.225542	1,613(1,613)
GWS	GMV-MFPC	IRI-PT	0.1114	-0.00601926	-0.0142936	0.00136295	0.0816	0.013066	-0.0016924	0.0293466	< 0.0001	0.162307	0.0933571	0.232753	< 0.0001	0.156287	0.0882455	0.226375	1,613(1,613)
GWS	GMV-OFC_R	IRI-PT	0.2748	-0.00288789	-0.00891124	0.00219609	0.3004	0.00548662	-0.00479208	0.0171762	0.0002	0.158711	0.0882493	0.227837	0.0002	0.155823	0.0852019	0.225425	1,613(1,613)
GWS	ReHo-ITG_L	IRI-PT	0.7672	0.00151931	-0.00866639	0.0117785	0.3106	-0.0104886	-0.0312973	0.00926207	0.0002	0.148156	0.0786029	0.219812	0.0002	0.149675	0.0809903	0.220751	1,590(1,590)
GWS	ReHo-ITG_R	IRI-PT	0.2822	0.00585511	-0.00489384	0.0169942	0.3966	-0.00939133	-0.0316848	0.0125273	0.0002	0.143245	0.0729077	0.213331	0.0002	0.1491	0.0798022	0.218614	1,590(1,590)
GWS	ReHo-MOFC	IRI-PT	0.1238	0.00650328	-0.00157439	0.0155305	0.8244	0.00188595	-0.0153143	0.0190673	< 0.0001	0.143225	0.0742939	0.211236	< 0.0001	0.149729	0.0817059	0.21734	1,590(1,590)
GWS	FA-CBT_L	SWL	0.1206	0.00418551	-0.00104925	0.0103786	0.9672	-0.000197252	-0.0111315	0.0108461	0.0014	0.11528	0.0437929	0.185074	0.0012	0.119465	0.0484869	0.189304	1,574(1,574)
GWS	FA-CST_R	SWL	0.2368	0.00316295	-0.00214098	0.00927427	0.5452	0.00335777	-0.00742592	0.0151401	0.001	0.116275	0.0469004	0.185275	0.0006	0.119437	0.0498837	0.187752	1,574(1,574)
GWS	FA-DRTT_R	SWL	0.0852	0.00527531	-0.000729701	0.0121942	0.1448	-0.00905357	-0.0230885	0.00316059	0.0018	0.113913	0.0433129	0.183423	0.0006	0.119188	0.0478049	0.18775	1,574(1,574)
GWS	FA-PAT_R	SWL	0.2512	-0.00284803	-0.00875708	0.00189485	0.4578	0.00356688	-0.00631986	0.0144343	0.0014	0.122084	0.0514465	0.191093	0.002	0.119236	0.0479639	0.187866	1,574(1,574)
GWS	FA-RST_L	SWL	0.0642	0.00561486	-0.000325806	0.0125651	0.9438	0.000461357	-0.011429	0.0124616	0.0008	0.114127	0.0442851	0.184354	0.0006	0.119742	0.049731	0.189875	1,574(1,574)
GWS	FA-RST_R	SWL	0.7302	0.000736165	-0.00342965	0.00518013	0.345	-0.00388327	-0.0137645	0.00417845	0.0006	0.118484	0.049142	0.188168	0.0004	0.11922	0.0500632	0.189188	1,574(1,574)
GWS	FA-SCP	SWL	0.0364	0.00404889	0.00017843	0.00974793	0.4512	0.00293768	-0.00474592	0.0122689	0.0008	0.114981	0.0448465	0.185938	0.0006	0.11903	0.049277	0.189495	1,574(1,574)
GWS	GMV-CPL_L	SWL	0.0038	0.00839235	0.00241412	0.0157937	0.9576	0.000269091	-0.0115675	0.0123401	0.0006	0.120574	0.0510651	0.189529	0.0002	0.128966	0.059558	0.197816	1,613(1,613)
GWS	GMV-CPL_R	SWL	0.0624	0.00549952	-0.000291152	0.0124132	0.4144	0.00474304	-0.00694277	0.017694	0.0008	0.12397	0.0557489	0.194139	0.0002	0.129469	0.0616018	0.200168	1,613(1,613)
GWS	GMV-CV4-5	SWL	0.7866	-0.00083556	-0.00734758	0.00555813	0.9238	-0.00052978	-0.0134198	0.0125299	< 0.0001	0.13022	0.0610996	0.199033	< 0.0001	0.129384	0.0607624	0.197618	1,613(1,613)
GWS	GMV-ITG_L	SWL	0.6208	0.00210334	-0.00607738	0.0105605	0.1612	0.0116825	-0.00444601	0.0294756	0.0006	0.126875	0.058161	0.196844	0.0002	0.128978	0.0606194	0.19838	1,613(1,613)
GWS	GMV-MFPC	SWL	0.478	0.00272202	-0.0045855	0.0106156	0.4098	0.00618895	-0.00877699	0.0221402	0.0002	0.126271	0.0567448	0.195955	0.0002	0.128993	0.0602131	0.198427	1,613(1,613)
GWS	GMV-OFC_R	SWL	0.8948	0.000350353	-0.00491675	0.00577522	0.0722	0.00946893	-0.000823997	0.0219009	< 0.0001	0.128487	0.0579329	0.196632	< 0.0001	0.128837	0.0585063	0.196251	1,613(1,613)
GWS	ReHo-ITG_L	SWL	0.0592	0.00979082	-0.000369469	0.0207016	0.1102	0.0166606	-0.0038193	0.0382389	0.0012	0.122182	0.0522884	0.191799	0.0004	0.131973	0.0632342	0.201042	1,590(1,590)
GWS	ReHo-ITG_R	SWL	0.4292	0.00429634	-0.00673016	0.0151411	0.0338	0.0239483	0.0021671	0.0469199	0.0002	0.127771	0.0571316	0.19999	< 0.0001	0.132068	0.0619558	0.204166	1,590(1,590)
GWS	ReHo-MOFC	SWL	0.6246	0.00219187	-0.00623186	0.0108788	0.1018	-0.0138643	-0.0321616	0.00270398	< 0.0001	0.129383	0.0592178	0.200451	< 0.0001	0.131575	0.0611349	0.202498	1,590(1,590)
GWS	FA-CBT_L	TPQ-NS	0.4278	0.00201208	-0.00303004	0.00740427	0.1576	0.00702243	-0.00266141	0.0178028	< 0.0001	0.140185	0.0806463	0.198701	< 0.0001	0.142198	0.0827449	0.200794	2,206(2,206)
GWS	FA-CST_R	TPQ-NS	0.2048	0.00269556	-0.00143416	0.0075227	0.1676	0.00588301	-0.00232828	0.0154338	< 0.0001	0.139338	0.0797811	0.198297	< 0.0001	0.142033	0.08255	0.201242	2,206(2,206)
GWS	FA-DRTT_R	TPQ-NS	0.1396	0.00337994	-0.00110296	0.00844718	0.9102	0.000456852	-0.00876931	0.00960954	< 0.0001	0.138409	0.0791948	0.196271	< 0.0001	0.141789	0.0826782	0.19977	2,206(2,206)
GWS	FA-PAT_R	TPQ-NS	0.5886	0.00115968	-0.00318174	0.0057674	0.2526	0.00480395	-0.00353369	0.014064	< 0.0001	0.14037	0.0809089	0.200492	< 0.0001	0.14153	0.0820534	0.201629	2,206(2,206)
GWS	FA-RST_L	TPQ-NS	0.2882	0.00278154	-0.00227496	0.00845438	0.0426	0.0103263	0.000254695	0.0218502	< 0.0001	0.138491	0.0799543	0.196454	< 0.0001	0.141273	0.0832176	0.199263	2,206(2,206)
GWS	FA-RST_R	TPQ-NS	0.6542	0.000917584	-0.00311371	0.00522476	0.6098	0.00204426	-0.00585519	0.0105595	< 0.0001	0.140949	0.0818718	0.200718	< 0.0001	0.141866	0.0833511	0.201668	2,206(2,206)
GWS	FA-SCP	TPQ-NS	0.1508	0.00298204	-0.00106986	0.00768191	0.3656	-0.00383839	-0.013001	0.00456701	< 0.0001	0.138888	0.0806248	0.197609	< 0.0001	0.14187	0.0835792	0.200247	2,206(2,206)
GWS	GMV-CPL_L	TPQ-NS	0.3684	0.00230759	-0.00261959	0.00771301	0.0504	0.0099778	-1.26046e-05	0.0214758	< 0.0001	0.146088	0.0868071	0.204731	< 0.0001	0.148395	0.0891964	0.206965	2,261(2,261)
GWS	GMV-CPL_R	TPQ-NS	0.081	0.00468412	-0.000572422	0.0106869	0.175	0.00717665	-0.0030108	0.0185719	< 0.0001	0.142731	0.0844775	0.200441	< 0.0001	0.147415	0.0888892	0.205201	2,261(2,261)
GWS	GMV-CV4-5	TPQ-NS	0.8854	0.000331065	-0.0047313	0.00542908	0.938	0.000369226	-0.0094331	0.0102085	< 0.0001	0.147373	0.0894109	0.205425	< 0.0001	0.147704	0.0899511	0.205527	2,261(2,261)
GWS	GMV-ITG_L	TPQ-NS	0.0002	0.0122466	0.00553923	0.019855	0.0182	0.0153106	0.00232406	0.0292914	< 0.0001	0.135597	0.0780454	0.194232	< 0.0001	0.147844	0.0903277	0.206038	2,261(2,261)
GWS	GMV-MFPC	TPQ-NS	0.0014	0.0104841	0.00399235	0.0179072	0.1024	0.0108189	-0.00210489	0.024611	< 0.0001	0.137866	0.0803983	0.195794	< 0.0001	0.14835	0.0908632	0.206345	2,261(2,261)
GWS	GMV-OFC_R	TPQ-NS	0.0246	0.00541335	0.000595765	0.0112124	0.0138	0.0119422	0.00226512	0.0237443	< 0.0001	0.142417	0.0846602	0.201891	< 0.0001	0.14783	0.0896635	0.207434	2,261(2,261)
GWS	ReHo-ITG_L	TPQ-NS	0.001	0.0131259	0.00525643	0.021838	0.624	0.00391669	-0.0117658	0.0200564	< 0.0001	0.130807	0.0714485	0.190815	< 0.0001	0.143933	0.0850484	0.202921	2,226(2,226)
GWS	ReHo-ITG_R	TPQ-NS	< 0.0001	0.0193163	0.0102853	0.0292933	0.3124	0.00891781	-0.00854721	0.0266998	< 0.0001	0.125421	0.0663052	0.183936	< 0.0001	0.144737	0.0852473	0.202628	2,226(2,226)
GWS	ReHo-MOFC	TPQ-NS	0.3196	0.00377995	-0.00377302	0.0115718	0.0888	-0.0128614	-0.0288029	0.00195991	< 0.0001	0.141209	0.0818121	0.20022	< 0.0001	0.144989	0.0858896	0.203409	2,226(2,226)
GWS	FA-CBT_L	TPQ-RD	0.3658	0.00220965	-0.00274216	0.00743535	0.3076	0.00516494	-0.00451264	0.0158037	< 0.0001	-0.141247	-0.201271	-0.0822096	< 0.0001	-0.139038	-0.198758	-0.0804486	2,206(2,206)
GWS	FA-CST_R	TPQ-RD	0.958	8.3814e-05	-0.00436854	0.0043848	0.3694	0.00378261	-0.00465901	0.0128671	< 0.0001	-0.139292	-0.199067	-0.0808209	< 0.0001	-0.139208	-0.198996	-0.0807716	2,206(2,206)
GWS	FA-DRTT_R	TPQ-RD	0.7392	0.000740185	-0.00377158	0.00539252	0.602	-0.00238457	-0.0118278	0.00646214	< 0.0001	-0.139737	-0.198349	-0.0805716	< 0.0001	-0.138997	-0.197058	-0.0802312	2,206(2,206)
GWS	FA-PAT_R	TPQ-RD	0.8536	-0.000425819	-0.00483283	0.00391575	0.88	-0.000687157	-0.00961062	0.00782468	< 0.0001	-0.138539	-0.197714	-0.0804912	< 0.0001	-0.138965	-0.197767	-0.0810099	2,206(2,206)
GWS	FA-RST_L	TPQ-RD	0.4166	-0.0020934	-0.00750821	0.00302287	0.9032	-0.000531922	-0.0111998	0.0104744	< 0.0001	-0.137383	-0.196134	-0.0797066	< 0.0001	-0.139476	-0.197848	-0.0813646	2,206(2,206)
GWS	FA-RST_R	TPQ-RD	0.1556	-0.00285163	-0.00751346	0.00104256	0.955	0.000181231	-0.0078911	0.00821882	< 0.0001	-0.13657	-0.195837	-0.0784736	0.0002	-0.139422	-0.198674	-0.0811788	2,206(2,206)
GWS	FA-SCP	TPQ-RD	0.8416	0.000443975	-0.00370043	0.0047786	0.3418	-0.00401675	-0.0130997	0.00428706	< 0.0001	-0.139755	-0.198766	-0.0802105	< 0.0001	-0.139311	-0.19832	-0.0799771	2,206(2,206)
GWS	GMV-CPL_L	TPQ-RD	0.5588	0.00146306	-0.00362389	0.00677135	0.1616	0.00722208	-0.00282847	0.0186381	< 0.0001	-0.133364	-0.191504	-0.0752624	< 0.0001	-0.131901	-0.190558	-0.0739995	2,261(2,261)
GWS	GMV-CPL_R	TPQ-RD	0.668	0.00114326	-0.00415337	0.00639647	0.0026	0.0151088	0.00449422	0.0276438	< 0.0001	-0.132951	-0.191389	-0.0765193	< 0.0001	-0.131808	-0.190017	-0.0753326	2,261(2,261)
GWS	GMV-CV4-5	TPQ-RD	0.2888	0.00263418	-0.00224381	0.00791163	0.8116	0.00126935	-0.00881032	0.0115434	< 0.0001	-0.134432	-0.194291	-0.0758352	< 0.0001	-0.131797	-0.191312	-0.073397	2,261(2,261)
GWS	GMV-ITG_L	TPQ-RD	0.0652	0.0060439	-0.000331954	0.0128509	0.9578	0.000227972	-0.0128283	0.013224	< 0.0001	-0.137746	-0.195578	-0.0805668	< 0.0001	-0.131702	-0.189166	-0.0754247	2,261(2,261)
GWS	GMV-MFPC	TPQ-RD	0.0282	0.00721804	0.000902999	0.0142415	0.4396	-0.00506361	-0.0183578	0.00781775	< 0.0001	-0.139037	-0.197943	-0.0809289	< 0.0001	-0.131819	-0.190245	-0.0738418	2,261(2,261)
GWS	GMV-OFC_R	TPQ-RD	0.0496	0.00483843	4.30511e-06	0.0104494	0.344	-0.00460523	-0.0148048	0.00484351	< 0.0001	-0.136886	-0.194734	-0.0800744	< 0.0001	-0.132047	-0.189564	-0.0752131	2,261(2,261)
GWS	ReHo-ITG_L	TPQ-RD	0.5212	-0.00259527	-0.0107232	0.00516269	0.4532	0.00605404	-0.00967005	0.02275	< 0.0001	-0.138347	-0.197857	-0.0783152	< 0.0001	-0.140943	-0.199949	-0.0814869	2,226(2,226)
GWS	ReHo-ITG_R	TPQ-RD	0.6524	0.00192446	-0.00670051	0.0106661	0.342	0.00838294	-0.0086874	0.026082	< 0.0001	-0.143565	-0.202149	-0.0839592	< 0.0001	-0.14164	-0.199746	-0.0829558	2,226(2,226)
GWS	ReHo-MOFC	TPQ-RD	0.6082	-0.00194484	-0.00941718	0.00548545	0.8996	0.00100326	-0.0140285	0.0163621	< 0.0001	-0.139306	-0.198562	-0.0806231	< 0.0001	-0.141251	-0.19978	-0.0824959	2,226(2,226)
GWS	FA-CBT_L	WM	0.9254	0.00019632	-0.0050767	0.00532626	0.0658	0.00947687	-0.000608739	0.0211828	< 0.0001	0.190108	0.131757	0.24934	< 0.0001	0.190304	0.132293	0.249147	2,092(2,092)
GWS	FA-CST_R	WM	0.9912	-3.7264e-06	-0.00456307	0.00452736	0.1198	0.00690397	-0.00172742	0.0171462	< 0.0001	0.190484	0.13038	0.250918	< 0.0001	0.190481	0.131051	0.250634	2,092(2,092)
GWS	FA-DRTT_R	WM	0.6072	-0.00119553	-0.00619475	0.00366069	0.4296	0.00380217	-0.00545252	0.0139971	< 0.0001	0.191041	0.132035	0.250795	< 0.0001	0.189846	0.1306	0.250137	2,092(2,092)
GWS	FA-PAT_R	WM	0.1434	0.00314618	-0.00102018	0.00816785	0.0546	-0.00843819	-0.0188647	0.000194173	< 0.0001	0.187725	0.128321	0.246667	< 0.0001	0.190871	0.131893	0.249853	2,092(2,092)
GWS	FA-RST_L	WM	0.348	-0.0026076	-0.00857378	0.00280298	0.6168	0.0027481	-0.00833786	0.01432	< 0.0001	0.193034	0.13253	0.254964	< 0.0001	0.190427	0.129747	0.252255	2,092(2,092)
GWS	FA-RST_R	WM	0.1592	-0.00287894	-0.00765726	0.00113654	0.6892	0.00165519	-0.0069508	0.01063	< 0.0001	0.193523	0.131736	0.254551	< 0.0001	0.190645	0.129372	0.251386	2,092(2,092)
GWS	FA-SCP	WM	0.547	-0.00123215	-0.00561291	0.00272268	0.7606	-0.00120597	-0.00962822	0.00705539	< 0.0001	0.191606	0.132415	0.252202	< 0.0001	0.190374	0.131188	0.250613	2,092(2,092)
GWS	GMV-CPL_L	WM	0.1434	0.00373554	-0.00125984	0.00932132	0.5126	0.00335015	-0.00646322	0.013934	< 0.0001	0.191431	0.131662	0.251561	< 0.0001	0.195167	0.135565	0.255167	2,145(2,145)
GWS	GMV-CPL_R	WM	0.0268	0.00577196	0.000635697	0.0118455	0.8682	0.000817052	-0.0100094	0.0115872	< 0.0001	0.190007	0.130173	0.248648	< 0.0001	0.195779	0.136507	0.254067	2,145(2,145)
GWS	GMV-CV4-5	WM	0.0028	0.007864	0.00239635	0.0142345	0.1548	0.00779128	-0.00269795	0.0195172	< 0.0001	0.188632	0.129003	0.248775	< 0.0001	0.196496	0.136867	0.255904	2,145(2,145)
GWS	GMV-ITG_L	WM	0.0082	-0.00848391	-0.0156699	-0.00218859	0.0354	0.0133265	0.000843123	0.0269339	< 0.0001	0.204327	0.145633	0.26361	< 0.0001	0.195843	0.137415	0.255551	2,145(2,145)
GWS	GMV-MFPC	WM	0.1116	-0.00547483	-0.0126801	0.00125375	0.745	0.00235624	-0.0111536	0.0165873	< 0.0001	0.20073	0.140691	0.261774	< 0.0001	0.195255	0.135724	0.25543	2,145(2,145)
GWS	GMV-OFC_R	WM	0.2644	-0.00275787	-0.00805168	0.00204409	0.6628	0.00213502	-0.00774078	0.0123842	< 0.0001	0.198912	0.140509	0.259796	< 0.0001	0.196154	0.137696	0.256918	2,145(2,145)
GWS	ReHo-ITG_L	WM	0.6666	0.00179325	-0.00634835	0.0100627	0.092	0.0138763	-0.00240804	0.0305894	< 0.0001	0.191754	0.131758	0.251616	< 0.0001	0.193547	0.133086	0.253421	2,112(2,112)
GWS	ReHo-ITG_R	WM	0.188	-0.00602066	-0.0153828	0.00287235	0.242	0.0105262	-0.00724867	0.0291196	< 0.0001	0.199168	0.138625	0.258619	< 0.0001	0.193147	0.133121	0.252935	2,112(2,112)
GWS	ReHo-MOFC	WM	0.3654	0.00357198	-0.0040993	0.0115055	0.0764	0.0135714	-0.00143255	0.0299158	< 0.0001	0.189885	0.128747	0.251009	< 0.0001	0.193457	0.133554	0.253331	2,112(2,112)
The significant mediation and moderation (Pc < 0.05, uncorrected P < 0.05/7.63/11=5.95×10-4) are shown in red and bold; The mediation and moderation effects reaching a norminal P < 0.05 were shown in black and bold. β, regression coeffecient. Abbreviation: BFI, big five inventory; BFI-O, openness; BIS, Barratt impulsiveness scale; BIS-CI, cognitive impulsiveness; CBT, corticobulbar tract; CPL, ce…

[truncated: 4 more sheets: Supplementary Table 11, Supplementary Table 12, Supplementary Table 13, Supplementary Table 14]
